# Supplementary material
Source: PubMed Central journal article supplement (PMC4813053)
Supplement: 10-1055-s-0035-1545741-sup_gf905.pdf [file 10-1055-s-0035-1545741-sup_gf905.pdf]

# Die Vulvovaginalkandidose (außer chronisch mukokutaner Kandidose). Leitlinie der Deutschen Gesellschaft für Gynäkologie und Geburtshilfe (AWMF-Registernummer 015/072, S2k-Level, Dezember 2013)

Vulvovaginal Candidosis (excluding chronic mucocutaneous candidosis). Guideline of the German Society of Gynecology and Obstetrics (AWMF Registry No. 015/072, S2k Level, December 2013)

**Autoren** W. Mendling<sup>1</sup>, K. Friese<sup>2</sup>, I. Mylonas<sup>2</sup>, E.-R. Weissenbacher<sup>3</sup>, J. Brasch<sup>4</sup>, M. Schaller<sup>5</sup>, P. Mayer<sup>6</sup>, I. Effendy<sup>7</sup>, G. Ginter-Hanselmayer<sup>8</sup>, H. Hof<sup>9</sup>, O. Cornely<sup>10</sup>, M. Ruhnke<sup>11</sup>

**Institute** Die Institutsangaben sind am Ende des Beitrags gelistet.

## I. Leitlinieninformationen

### Herausgeber

#### Federführende Fachgesellschaft

Deutsche Gesellschaft für Gynäkologie und Geburtshilfe (DGGG) e. V.  
Repräsentanz der DGGG und Fachgesellschaften  
Hausvogteiplatz 12  
10117 Berlin  
Tel.: + 49 (0) 30-5 14 88 33 40  
Fax: + 49 (0) 30-5 14 88 33 44  
info@dggg.de  
<http://www.dggg.de/>

#### Präsident der DGGG

Prof. Dr. med. Diethelm Wallwiener  
Universitätsfrauenklinik Tübingen  
Calwerstraße 7  
72076 Tübingen

#### DGGG-Leitlinienbeauftragter

Prof. Dr. Matthias W. Beckmann  
Universitätsklinikum Erlangen-Nürnberg  
Frauenklinik  
Universitätsstraße 21–23  
91054 Erlangen

#### DGGG-Leitlinienssekretariat

Dr. Paul Gaß, Tobias Brodtkorb, Marion Gebhardt  
Universitätsklinikum Erlangen-Nürnberg  
Frauenklinik  
Universitätsstraße 21–23  
91054 Erlangen  
Tel.: + 49 (0) 91 31-85/440 63  
or + 49 (0) 91 31-85/3 3507  
Fax: + 49 (0) 91 31-85/3 3951  
fk-dggg-leitlinien@uk-erlangen.de  
<http://www.dggg.de/leitlinienstellungnahmen>

### Zitierweise

Vulvovaginal Candidosis (excluding chronic mucocutaneous candidosis). Guideline of the German Society of Gynecology and Obstetrics (AWMF Registry No. 015/072, S2k Level, December 2013). *Geburtsh Frauenheilk* 2015; 75: 342–354

### Leitliniendokumente

Die vollständige Langfassung dieser Leitlinien sowie eine Aufstellung der Interessenkonflikte aller Autoren befindet sich auf der Homepage der AWMF: <http://www.awmf.org/leitlinien/detail/ll/015-072.html>

### Autoren

Siehe **Tab. 1**.

### Zusammenfassung

Die östrogenisierte Vagina ist in mindestens 20%, in der späten Schwangerschaft und bei immun-supprimierten Patientinnen in mindestens 30% durch Candida-Arten kolonisiert. Meistens handelt es sich dabei um *Candida albicans*.

Wirtsfaktoren, besonders lokale Abwehrmechanismen, Genpolymorphismen, Allergien, Serumglukosespiegel, Antibiotika, psychosozialer Stress und Östrogene beeinflussen das Risiko für eine Candida-Vulvovaginitis. Non-albicans-Arten, besonders *Candida glabrata*, in sehr seltenen Fällen auch *Saccharomyces cerevisiae*, verursachen mit regionalen Unterschieden in weniger als 10% aller Fälle eine Vulvovaginitis, die meist mit geringeren klinischen Zeichen und Symptomen einhergeht, als es bei einer *Candida-albicans*-Vaginitis üblich ist.

Typisch sind prämenstrueller Juckreiz, Brennen, Rötung und nicht riechender Ausfluss. Obwohl Juckreiz und Rötung des Introitus und der Vagina typische Symptome sind, leiden nur 35–40% der

### Bibliografie

**DOI** <http://dx.doi.org/10.1055/s-0035-1545741>  
*Geburtsh Frauenheilk* 2015; 75: 1–14 © Georg Thieme  
Verlag KG Stuttgart · New York ·  
ISSN 0016-5751

### Korrespondenzadresse

**Prof. Dr. med. Werner Mendling**  
Deutsches Zentrum für Infektionen in Gynäkologie und Geburtshilfe  
St. Anna-Klinik  
Vogelsangstraße 106  
42109 Wuppertal  
[w.mendling@t-online.de](mailto:w.mendling@t-online.de)

Tab. 1 Autoren.

| DGGG Arbeitsgemeinschaft/AWMF/nicht-AWMF Fachgesellschaft/Organisation/Verband |                                                                                                                                                                                                                                                                   |
|--------------------------------------------------------------------------------|-------------------------------------------------------------------------------------------------------------------------------------------------------------------------------------------------------------------------------------------------------------------|
| <b>Gynäkologen</b>                                                             |                                                                                                                                                                                                                                                                   |
| Prof. Dr. Werner Mendling                                                      | (federführend, verantwortlich)<br>Deutsche Gesellschaft für Gynäkologie und Geburtshilfe (DGGG)<br>Arbeitsgemeinschaft für Infektionen und Infektionsimmunologie in der Gynäkologie und Geburtshilfe (AGII)<br>Deutschsprachige Mykologische Gesellschaft (DMyKG) |
| Prof. Dr. Klaus Friese                                                         | Deutsche Gesellschaft für Gynäkologie und Geburtshilfe (DGGG)<br>Arbeitsgemeinschaft für Infektionen und Infektionsimmunologie in der Gynäkologie und Geburtshilfe (AGII)                                                                                         |
| Prof. Dr. Ioannis Mylonas                                                      | Deutsche Gesellschaft für Gynäkologie und Geburtshilfe (DGGG)<br>Arbeitsgemeinschaft für Infektionen und Infektionsimmunologie in der Gynäkologie und Geburtshilfe (AGII)                                                                                         |
| Prof. Dr. Ernst-Rainer Weissenbacher                                           | Deutsche Gesellschaft für Gynäkologie und Geburtshilfe (DGGG)<br>Arbeitsgemeinschaft für Infektionen und Infektionsimmunologie in der Gynäkologie und Geburtshilfe (AGII)                                                                                         |
| <b>Dermatologen</b>                                                            |                                                                                                                                                                                                                                                                   |
| Prof. Dr. Jochen Brasch                                                        | Deutsche Dermatologische Gesellschaft (DDG)<br>Deutschsprachige Mykologische Gesellschaft (DMyKG)<br>(federführend)                                                                                                                                               |
| Prof. Dr. Martin Schaller                                                      | Deutsche Dermatologische Gesellschaft (DDG) Deutschsprachige Mykologische Gesellschaft (DMyKG)                                                                                                                                                                    |
| Prof. Dr. Peter Mayer                                                          | Deutsche Dermatologische Gesellschaft (DDG)<br>Deutschsprachige Mykologische Gesellschaft (DMyKG)                                                                                                                                                                 |
| Prof. Dr. Isaak Effendy                                                        | Deutsche Dermatologische Gesellschaft (DDG)<br>Deutschsprachige Mykologische Gesellschaft (DMyKG)                                                                                                                                                                 |
| Prof. Dr. Gabriele Ginter-Hanselmayer                                          | Deutsche Dermatologische Gesellschaft (DDG)<br>Deutschsprachige Mykologische Gesellschaft (DMyKG)                                                                                                                                                                 |
| <b>Mikrobiologen</b>                                                           |                                                                                                                                                                                                                                                                   |
| Prof. Dr. Herbert Hof                                                          | Deutschsprachige Mykologische Gesellschaft (DMyKG)                                                                                                                                                                                                                |
| <b>Hämato-Onkologen</b>                                                        |                                                                                                                                                                                                                                                                   |
| Prof. Dr. Oliver Cornely                                                       | Deutschsprachige Mykologische Gesellschaft (DMyKG)                                                                                                                                                                                                                |
| Prof. Dr. Markus Ruhnke                                                        | Deutschsprachige Mykologische Gesellschaft (DMyKG)                                                                                                                                                                                                                |

Frauen, die genitales Juckreiz angeben, tatsächlich unter einer Vulvovaginalkandidose.

Anamnese, klinische Untersuchung und die mikroskopische Untersuchung des vaginalen Inhalts mit 400-facher Vergrößerung durch Licht-, noch besser Phasenkontrastmikroskopie sind zur Diagnostik obligat. In klinisch und mikroskopisch unsicheren Fällen oder bei chronisch rezidivierenden Fällen sollte eine Pilzkultur mit Erregerdifferenzierung und im Fall von Non-Candida-albicans-Arten eine minimale Hemmkonzentrations-(MHK-)Bestimmung erfolgen.

Die seltenere chronische mukokutane Kandidose, die bei beiden Geschlechtern vorkommt, ist ein eigenes Krankheitsbild mit anderen Ursachen sowie anderen diagnostischen und therapeutischen Maßnahmen.

Die Therapie mit jedem auf dem Markt befindlichen Antimykotikum (Polyene, z. B. Nystatin, Imidazole, z. B. Clotrimazol und viele andere, Ciclopiroxolamin) ist bei akuten Fällen leicht durchführbar und in über 80% der Fälle erfolgreich. Alle vaginalen Zubereitungsformen von Polyenen, Imidazolen und Ciclopiroxolamin, aber auch orale Triazole (Fluconazol, Itraconazol), die nach Angabe der Hersteller in der Schwangerschaft nicht verabreicht werden sollten, sind gleich erfolgreich (► Tab. 4). Candida glabrata ist gegen die üblichen Dosierungen aller für gynäkologische Zwecke zugelassenen Antimykotika klinisch nicht ausreichend empfindlich. Deshalb werden im Ausland vaginale Borsäurezäpfchen (600 mg 1–2 täglich für 14 Tage) oder Flucytosin-Vaginalzäpfchen empfohlen. Das erstere ist in Deutschland nicht erlaubt, das zweite nicht verfügbar. Deshalb wurden in Deutschland 800 mg Fluconazol pro Tag oral für 2–3 Wochen empfohlen. Wegen klinischer Persistenz von C. glabrata trotz hoher Fluconazol-dosen wurden oral Posaconazol oral oder neuerdings Echinocandine, z. B. Micafungin) diskutiert, was extrem teuer, für diese Indikation nicht zugelassen und durch Studien mit klinischer Evi-

denz nicht gestützt ist. Eine Resistenz gegen Candida albicans spielt klinisch im Fall der Vulvovaginalkandidose bei Verwendung von Polyenen oder Azolen aber keine bedeutende Rolle.

Candida krusei ist gegen die Triazole Fluconazol und Itraconazol resistent. Deshalb sollten hier lokale Imidazole oder Ciclopiroxolamin oder Nystatin zur Anwendung kommen. Allerdings liegen dazu keine Studien vor. Nebenwirkungen, Toxizität, Embryotoxizität und Allergie sind klinisch nicht bedeutend. Eine vaginale Behandlung mit Clotrimazol im 1. Trimester einer Schwangerschaft reduziert die Rate von Frühgeburten.

Obwohl es nicht notwendig ist, die vaginale Candida-Kolonisation bei gesunden Frauen zu therapieren, wird eine vaginale Antimykotikagabe in Deutschland im 3. Trimester einer Schwangerschaft empfohlen, um die Rate des „Mundsoors“ und der „Windeldermatitis“ bei reifen gesunden Neugeborenen zu reduzieren. Die chronisch rezidivierende Vulvovaginalkandidose (CRVVC) wird intermittierend mit einer Suppressionstherapie behandelt, solange immunologische Therapien nicht verfügbar sind. Die Rückfallquote bei wöchentlicher bis monatlicher oraler Fluconazoltherapie über etwa 6 Monate liegt in bisherigen Studien bei etwa 50% nach Ende der Suppressionstherapie. Gute Ergebnisse wurden mit einem Fluconazolregime erzielt, bei dem initial in der ersten Woche an 3 Tagen je 200 mg Fluconazol und bei Beschwerde- und Pilzfreiheit eine dosisreduzierende Erhaltungstherapie über ein ganzes Jahr mit schließlich 1 × 200 mg pro Monat gegeben werden (► Abb. 2). Zukünftige Studien sollten eine Candida-Autovakzination, Antikörper gegen Candida-Virulenzfaktoren und andere immunologische Versuche einschließen. Auch sollten Probiotika mit geeigneten Laktobazillusstämmen in zukünftigen Studien wegen ermutigender Resultate untersucht werden. Von der OTC-Therapie (Selbsttherapie durch die Patientin) muss wegen einer hohen Rate von falschen Indikationen abgeraten werden.

## Methoden

Primär (Stand 2/2010) wurde eine Medline/PubMed-Suche mit Schlüsselwort „Vulvovaginal candidosis“ durchgeführt und ergab 2886 Titel; eine Suche mit den Schlüsselworten „Vulvovaginal candidosis therapy studies“ ergab 237 Reviews. Alle wurden nach Titel und Abstract durchsucht, aber es blieben nur wenige randomisierte oder prospektiv-kontrollierte Studien übrig [31,43,70,108,134,145]. Es gab nur 3 Metaanalysen oder Cochrane-Analysen [105,150,160] und 2 Leitlinien [13,82]. Dem wurde zu dieser Überarbeitung eine erneute Suche mit gleicher Methode für Arbeiten der letzten 5 Jahre (Stand 10.11.2013) angeschlossen, die 357 Treffer mit 44 Reviews und 32 klinischen Studien ergab. Auf eine systematische Bewertung der Literatur und eine Extraktion in Evidenztabelle wurde bei Klassifikation S2k verzichtet. Gleichwohl wurde die Literatur durch die beteiligten Experten kritisch gewürdigt.

Zum Konsensverfahren, der Patientenbeteiligung, der Bewertung und dem Umgang mit potenziellen Interessenkonflikten, der Beteiligung der verschiedenen Fachgesellschaften und der Gültigkeitsdauer siehe Leitlinienreport im Anhang!

## II. Verwendung der Leitlinie

### 1 Einführung

Die Vulvovaginalkandidose ist eine Infektion der östrogenisierten Vagina und des Vestibulums, die sich auch auf die Außenseite der kleinen Labien, die großen Labien und die Interkruralregion und die Perianalregion ausdehnen kann. Eine Kandidose der Zervix oder des Endometriums ist nicht bekannt. Eine konnatale, fetale Kandidose und eine Candida-Amnionitis sind selten möglich. Die Bezeichnung „Vulvovaginalkandidose“ oder „Candida-albicans-Vulvovaginitis“ werden bevorzugt [99]. Die Endung „-iasis“ sollte parasitären Infektionen vorbehalten bleiben, z.B. Trichomoniasis [69], sie wird aber wegen der weiten Verbreitung im angloamerikanischen Schrifttum leider häufig benutzt.

### 2 Zusammenfassung der Empfehlungen

**2.1** Die Diagnosestellung der vulvovaginalen Kandidose erfolgt immer durch eine Kombination aus Anamnese, klinischen Zeichen und Symptomen und dem Nachweis von Hefepilzen, die üblicherweise durch mikroskopische Untersuchungen des Nativpräparats aus Vaginalflüssigkeit (400-fache Vergrößerung, Licht- oder besser Phasenkonstrastmikroskopie) durchgeführt wird. In Zweifelsfällen, bei rezidivierenden oder komplizierten Fällen ist eine Hefepilzkultur mit Artbestimmung notwendig. Serologische Antikörpertiterbestimmungen werden nicht empfohlen.

**2.2** Die topische Therapie einer akuten Vulvovaginalkandidose ist mit Polyenen (Nystatin), mit Imidazolen oder mit Ciclopiroxolamin in einer großen Zahl verschiedener Zubereitungen wie Vaginaltabletten, Ovula oder Vaginalcremes für eine Behandlungsdauer von einem Tag bis zu einer Woche möglich oder mit oralen Triazolen (1-Tag-Behandlung), außerdem mit antimykotischen Hautcremes für die Vulva. Alle verglichenen unterschiedlichen Therapieregimes führten zu klinisch und mykologisch ähnlich guten Therapieergebnissen. Die Datenlage zur Therapie mit Antiseptika (z.B. Hexetidin, Octenidin, Dequaliniumchlorid) ist spärlich,

wenn auch Hinweise für ihre Wirksamkeit vorliegen. Sie wirken aber naturgemäß auch gegen die physiologische Vaginalflora.

Eine asymptomatische Kolonisation muss nicht behandelt werden, falls keine Immunsuppression oder Begleiterkrankungen oder eine chronisch rezidivierende Vulvovaginalkandidose vorliegen. Zur Behandlung der vaginalen Kolonisation während der Schwangerschaft siehe 9.2.

**2.3** Die topische Therapie der chronisch rezidivierenden Candida-albicans-Vulvovaginitis besteht – entsprechend dem Mangel an kausalen immunologischen Therapiemöglichkeiten – in einer suppressiven intermittierenden antimykotischen Therapie mit einem oralen Triazol über einen Zeitraum von Monaten. Die besten Resultate werden bisher mit dem Fluconazolregime von Donders et al. [31] erzielt (● **Abb. 2**).

**2.4** Die bei Candida albicans üblichen vaginalen oder oralen Behandlungen sind bei Candida-glabrata-Vaginitis weniger oder kaum wirksam. Deshalb wird im Ausland empfohlen, vaginale Borsäurezäpfchen 600 mg pro Tag für 14 Tage zu geben. Ebenso wird von einigen Autoren empfohlen, Amphotericin-B-Ovula, vaginales 17%iges Flucytosin oder oral 800 mg Fluconazol pro Tag für 2–3 Wochen zu geben (siehe auch 9.7). In Deutschland wurden auch Posaconazol p.o. für 15 Tage in Kombination mit einer lokalen Nystatin- und/oder Ciclopiroxolamintherapie sowie Mifungin vorgeschlagen [143].

Candida krusei ist gegen Fluconazol oder Itraconazol praktisch resistent (in vitro auch gegen Imidazole, in vivo jedoch nicht) und sollte deshalb mit lokalen Imidazolen, z.B. Clotrimazol, oder Ciclopiroxolamin (oder z.B. Borsäure in den USA) behandelt werden.

**2.5** In Deutschland gibt es eine Empfehlung zur antimykotischen Behandlung der asymptomatischen vaginalen Candida-Kolonisation während der letzten 6 Schwangerschaftswochen, um eine vertikale Transmission während der vaginalen Geburt auf das reife, gesunde Neugeborene zu verhindern. So kann die neonatale Candida-Infektion von über 10% der reifen, gesunden, von der Mutter kolonisierten Neugeborenen, die meist in der 2.–4. Lebenswoche auftritt, signifikant reduziert werden (siehe auch 9.2).

### 3 Mikrobiologie

Candida albicans bildet in vitro Blastosporen, Keimschläuche, Pseudomyzelien, echte Myzelien und auf Spezialnährböden auch Chlamydosporen. Candida glabrata kommt praktisch nur als Blastospore vor. Die Pseudohyphenbildung (außer von C. glabrata und einigen anderen Candida-Arten, die nur als Blastosporen vorkommen) ist Hinweis für eine Infektion [83,133].

Candida-Arten und -Stämme unterscheiden sich in der Pathogenität (in vitro), sodass sich eine Kandidose je nach Candida-Stamm und mehr oder weniger schwachen Abwehrmechanismen des Wirtes entwickeln kann [8].

85 bis 95% der die Vagina kolonisierenden Candida-Spezies bei prämenopausalen und schwangeren, asymptomatischen, gesunden Frauen und bei Frauen mit akuter Vaginalkandidose sind Candida albicans. Dieser sehr ähnlich sind C. stellatoidea, die bei Vulvovaginalkandidosen selten vorzukommen scheint (● **Abb. 1** und **Tab. 2**), und C. africana (● **Tab. 3**). Beide können nur mit speziellen diagnostischen Verfahren identifiziert werden [117,128]. Exakte epidemiologische Daten fehlen.

Non-Candida-albicans-Arten, besonders Candida glabrata, werden häufiger bei postmenopausalen, bei diabetischen und bei im-

| Spezies                | HIV-negativ<br>n = 383 | 100% |           | HIV-positiv<br>n = 66 | 100% |
|------------------------|------------------------|------|-----------|-----------------------|------|
| Candida                |                        |      |           |                       |      |
| positiv                | 88                     | 22,9 | p = 0,02  | 24                    | 36,4 |
| alle                   | 88                     | 100  |           | 24                    | 100  |
| <i>C. albicans</i>     | 77                     | 87,5 | p = 0,001 | 14                    | 58,3 |
| <i>C. glabrata</i>     | 6                      | 6,8  |           | 8                     | 33,3 |
| <i>C. krusei</i>       | 2                      | 2,3  |           | 0                     | 0    |
| <i>C. dubliniensis</i> | 1                      | 1,1  |           | 0                     | 0    |
| <i>C. parapsilosis</i> | 1                      | 1,1  |           | 1                     | 4,2  |
| <i>C. famata</i>       | 1                      | 1,1  |           | 0                     | 0    |
| <i>C. magnoliae</i>    |                        |      |           | 1                     | 4,2  |

**Abb. 1** Candida-Kolonisation der Vagina bei gesunden Frauen [81].

**Tab. 2** Verteilung der vaginalen Candida-Arten bei HIV-negativen kolonisierten Frauen [81].

| Patientinnen           | prämenopausal  |      | postmenopausal |      | schwanger      |      | nicht schwanger |      |
|------------------------|----------------|------|----------------|------|----------------|------|-----------------|------|
| alle                   | n = 338        |      | n = 45         |      | n = 192        |      | n = 146         |      |
| mit positiver Kultur   | n = 92 (23,3%) |      | n = 6 (13,3%)  |      | n = 52 (27,1%) |      | n = 30 (20,5%)  |      |
|                        | p = 0,003      |      |                |      | p = 0,02       |      |                 |      |
|                        | n              | %    | n              | %    | n              | %    | n               | %    |
| <i>C. albicans</i>     | 75             | 91,5 | 2              | 33,3 | 48             | 92,3 | 27              | 90,0 |
| <i>C. glabrata</i>     | 4              | 4,9  | 2              | 33,3 | 2              | 3,8  | 2               | 6,7  |
| <i>C. krusei</i>       | 1              | 1,2  | 1              | 16,7 | 1              | 1,9  | 0               | –    |
| <i>C. dubliniensis</i> | 1              | 1,2  | 0              | –    | 1              | 1,9  | 0               | –    |
| <i>C. famata</i>       | 0              | –    | 1              | 16,7 | 0              | –    | 0               | –    |
| <i>C. parapsilosis</i> | 1              | 1,2  | 0              | –    | 0              | –    | 1               | 3,3  |

**Tab. 3** Verteilung der Candida-Arten bei 472 Fällen von akuter Vaginalkandidose in Polen und Deutschland [80].

|                                                                                               | n   | %    |
|-----------------------------------------------------------------------------------------------|-----|------|
| akute Candida-Vulvovaginitis                                                                  | 472 | 100  |
| <i>C. albicans</i>                                                                            | 450 | 95,3 |
| <i>C. glabrata</i>                                                                            | 10  | 2,1  |
| <i>C. krusei</i>                                                                              | 4   | 0,9  |
| andere ( <i>C. tropicalis</i> , <i>C. kefyr</i> , <i>C. africana</i> , <i>S. cerevisiae</i> ) | 11  | 2,3  |

munsupprimierten Frauen gefunden [23, 52, 53, 67, 81, 98, 100]. Es gibt erhebliche regionale Unterschiede in der Verteilung der Candida-Arten (☛ **Abb. 1** und **Tab. 2** als Beispiel für Berlin), aber keine Beweise für das gehäufte Vorkommen von Non-Candida-albicans-Arten bei der vaginalen Kolonisation: In einer retrospektiven PCR-gestützten Analyse von 93 775 zervikovaginalen Abstrichen aus 4 Jahren, die zur Abklärung von Vulvovaginalkandidosen entnommen worden waren, waren *C. albicans* mit 89%, *C. glabrata* mit 7,9% und andere Candida-Arten mit jeweils unter 2% Häufigkeit vertreten [147], was auch aus deutschen [80, 81] (☛ **Tab. 3**) und englischen Studien [55] bekannt ist. *Candida krusei*, *Candida guilliermondii*, *Candida tropicalis*, *Candida parapsilosis* und andere Spezies können in Einzelfällen eine Vulvovaginitis mit typischen Symptomen verursachen [81, 97, 129, 133, 138].

*Saccharomyces cerevisiae* verursacht sehr selten vaginale Beschwerden [83, 131], wurde aber asymptomatisch in 1 bis 2% der vaginalen Kulturen identifiziert [81, 100] (☛ **Tab. 3**).

Man hat verschiedene Genotypen von *Candida albicans*-Stämmen bei asymptomatischen Frauen und bei solchen mit akuter Candida-Vaginitis identifiziert [68]. Durch PCR konnten identische *Candida albicans*-Stämme sowohl im Orintestinaltrakt und der Scheide der selben Frau als auch in der Scheide der Frau und im Sperma ihres asymptomatischen Partners nachgewiesen werden [79].

#### 4 Virulenzfaktoren von *Candida albicans*

Der erste Schritt von der Kolonisation zur Infektion ist die Adhärenz der Candida-Zelle an der Vaginalwand mithilfe von Manno-proteinen [38, 135, 142].

Die Fähigkeit zur (Pseudo-)Hyphenbildung und die Sekretion von hydrolytischen Proteinen wie z.B. sekretorische Aspartatproteinasen (Sap 1–10) sind wahrscheinlich die bedeutendsten Virulenzfaktoren [7, 92, 120]. Diese korrelieren mit der Pathogenität [16, 51].

Siderophore ermöglichen die Nutzung von Wirtseisen [50, 60]. Weitere Wirtsfaktoren sind eine starke pH-Toleranz von 2 bis 11 [75] und Enzyme, die *Candida albicans* das Überleben in Makrophagen ermöglichen [66].

Bakterien oder Pilze können Biofilme bilden, in denen sie allein oder symbiotisch mit anderen in einer Matrixsubstanz stark or-

ganisiert und geschützt sind. Auler et al. [4] und Chassot et al. [21] beschrieben ein Biofilm-Phänomen von *C. albicans* an Intrauterinpressaren. Bei systematischen Untersuchungen von Frauen mit Vulvovaginalkandidosen in Berlin und in China mit klarer Definition, was unter Biofilm zu verstehen ist, konnten an zahlreichen Vaginalgewebeproben aber keine Candida-Biofilme festgestellt werden, wohl aber das schon seit Langem [126] bekannte Phänomen, dass Pseudohyphen von Candida 8 bis 10 Zelllagen tief ins Vaginalgewebe vordringen, aber auch zahlreiche Bakterien der abnormalen Vaginalflora mit in das Gewebe eindringen lassen, was erstmals bei Vulvovaginalkandidosen durch Fluoreszenz-in-situ-Hybridisierung (FISH) gezeigt werden konnte [139]. Der Schritt von der Kolonisation zur Vaginitis ist bisher nicht ganz verstanden und belegt die Bedeutung von Wirtsfaktoren [41]. Jedenfalls kommt es nach Kolonisation zunächst zu Adhärenz am Vaginalepithel, dann mithilfe von Candida-Virulenzfaktoren, insbesondere sekretorischen Aspartatproteasen, zur Invasion bzw. Infektion und Inflammation.

## 5 Genitale Kolonisation

Entsprechend der Östrogenisation der Vagina [29] und Östrogenrezeptoren bei *Candida albicans* [107, 140] sind Mädchen vor der Menarche und Frauen nach der Menopause weniger häufig vaginal kolonisiert und leiden deshalb meist nicht an einer Candida-Vaginitis. So wurde auch in Tierversuchen festgestellt, dass Vaginalkandidosen nur nach Zugabe von Östrogenen bei kastrierten Tieren auftreten konnten. Gesunde, nicht schwangere und prämenopausale Frauen sind in etwa 20 bis 30% der Fälle vaginal kolonisiert, schwangere Frauen in mindestens 30% im 3. Trimenon und Frauen mit Immundefiziten in mindestens 30%, sofern kulturelle Nachweismethoden verwendet werden [81, 98] (• **Abb. 1** und **Tab. 2**). Mit PCR ist der Nachweis einer vaginalen Candida-Kolonisation um mindestens 10% häufiger möglich [152]. Die vaginale Kolonisation kann individuell von Zeit zu Zeit wechseln: In einer longitudinalen Kohortenstudie mit 1248 asymptomatischen gesunden jungen Frauen waren 70% von ihnen über die Dauer eines Jahres mindestens einmal kolonisiert, allerdings nur 4% von ihnen bei allen Visiten, die alle 3 Monate stattfanden. Als Risikofaktor wurden kürzlich zurückliegender sexueller Verkehr, die Injektion von Medroxyprogesteronacetat (einem Ovulationshemmer) und die gleichzeitige Kolonisation mit Laktobazillen und B-Streptokokken identifiziert [6].

Das Sperma des Partners kann mit dem identischen Candida-Stamm wie der in der Vagina kolonisiert sein [79], obwohl der Partner symptomfrei ist. Die Candida-Balanitis ist natürlich behandlungsbedürftig, doch kann eine vorübergehende Rötung der Eichel nach Verkehr mit einer von Candida kolonisierten Frau allergischer Natur durch Candida-Antigene sein. Es ist allerdings nicht klar, ob die Kolonisation des Genitaltrakts des Partners oder die des Orointestinaltrakts beider Partner als Quelle für chronisch rezidivierende Candida-Vaginitiden eine Rolle spielt [133]. Es gibt keinen Beweis für einen Anstieg der Häufigkeit von Kandidosen in der Gynäkologie, weder bei akuten noch bei chronisch rezidivierenden Vaginalkandidosen.

## 6 Prädisponierende Wirtsfaktoren

Patientinnen mit Diabetes mellitus leiden häufiger unter einer Vaginalkandidose, und die Therapie versagt, solange die Serumglukosespiegel nicht normalisiert sind [12].

Es wurde auch eine schwächere Glukosetoleranz bei etwa 25% mehr Frauen mit CRVVC gefunden als bei gesunden Kontrollen [32]. Auch Adipositas dürfte, verbunden mit Intertrigo durch Scheuern und Schwitzen, zu Kandidosen im Genitalbereich beitragen.

Obwohl *Candida glabrata* weniger virulent ist, sind Frauen mit Typ-II-Diabetes mellitus häufiger davon kolonisiert als Gesunde [67, 109].

Die vaginale Candida-Kolonisation wird von oralen Kontrazeptiva mit modernen niedrigen Östrogenspiegeln, die den Kohlenstoffmetabolismus nicht signifikant beeinflussen [48], vermutlich nicht erhöht [28]. Ähnlich verhält es sich mit der Frequenz von vaginalen Kandidosen [44]. Allerdings gibt es auch widersprüchliche Beobachtungen [19, 122]. Andere sehen in einer systematischen Literaturrecherche einen Trend zur Zunahme von Vulvovaginalkandidosen, wenn orale Kontrazeptiva eingenommen wurden, was allerdings von der Dosierung des Estrogenanteils abhängig ist [153].

Frauen mit hohem Östrogenspiegel und besonders solche in der Schwangerschaft haben häufiger eine vaginale Candida-Kolonisation. Frauen, die bereits vaginal von Candida-Arten kolonisiert sind, haben ein bis 33% höheres Risiko, eine Vaginalkandidose nach einer antibiotischen Behandlung zu entwickeln [34, 102, 104, 159].

Obwohl die Vaginalkandidose oft bei Frauen mit einer normalen Laktobazillusflora auftritt, wurden bei Frauen mit vaginaler Kandidose auch niedrigere Zahlen von Laktobazillen gefunden [3]. Man vermutet inzwischen, dass spezielle Stämme von Laktobazillen (z. B. von *Lactobacillus rhamnosus*) eine protektive Rolle gegen Vaginalkandidosen spielen können [71, 72].

Sobel [133] unterstreicht die wahrscheinlich unterschätzte Rolle des sexuellen Verhaltens für Rückfälle von Vaginalkandidose, weil nach Sexualverkehr, besonders Orogenitalkontakten, gehäuft Re-Infekte beobachtet werden konnten [34, 111, 122].

Nicht zuletzt sind auch genetische Faktoren für Rückfälle verantwortlich, nachdem Genpolymorphismen des mannosebindenden Lektins [5, 30] und ein Non-Sekretor-Phänotyp der ABO-Lewis-Blutgruppe als Risikofaktoren identifiziert worden sind [20]. Vier weibliche Mitglieder einer holländischen Familie waren entweder von einer rezidivierenden Vulvovaginalkandidose oder einer Onychomykose betroffen und wiesen alle eine bestimmte Mutation auf (Verlust der letzten 9 Aminosäuren in der Kohlenhydrat-Erkennungsdomäne). Die dadurch veränderte Form des Lectins Dectin-1 führte zu einer unzureichenden Produktion von Zytokinen (Interleukin-17, Tumor-Nekrose-Faktor, Interleukin-6) nach Stimulation mit  $\beta$ -Glucan oder *Candida albicans*. Im Gegensatz dazu waren Phagozytose und Abtötung von Pilzen bei diesen Patienten unbeeinflusst, was erklärt, warum ein Dectin-1-Mangel nicht mit invasiven Pilzinfektionen assoziiert ist. Interessanterweise trat die Symptomatik bei den homozygoten Töchtern im Alter von 10–12 Jahren auf, während das Manifestationsalter 40 bzw. 55 Jahre bei der heterozygoten Mutter bzw. dem Vater betrug, was sowohl hormonelle als auch Gen-Dosis-Effekte vermuten lässt [40]. Die nachgewiesene Mutation ist in Teilen von Afrika und Europa bemerkenswert häufig (3–7%).

Inzwischen sind tiefere Einsichten in das schwierige Gebiet der angeborenen und erworbenen Immunität gewonnen worden. Es

interessieren die bisher bekannten Faktoren der angeborenen und erworbenen humoralen Immunität und die Faktoren, die *Candida* neutralisieren sollen, um den Schritt von der asymptomatischen Kolonisation zur Adhärenz und Infektion zu verhindern. Dabei spielt auch die vaginale Mikrobiota eine noch nicht ausreichend verstandene Rolle. Th-1-induzierte dendritische T-Zellen/Langerhans'sche Zellen werden von Interleukin 12 gefördert. Orale und vaginale Epithelzellen sind in der Lage, den *Candida*-Polymorphismus (kolonisierende Blastosporen oder infizierende Pseudohyphen) zu differenzieren. Sie produzieren dann proinflammatorische Zytokine, die Neutrophile aktivieren. In der Vagina sind diese allerdings nicht protektiv, sondern führen hier zur Inflammation.

Erst seit Kurzem werden auch (wieder) Antikörper (AK) gegen *Candida*-Bestandteile als wichtig erkannt. Demnach sind AK-produzierende B-Zellen bei Vaginalkandidose protektiv wirkend [18, 58, 62, 116, 146].

Frauen mit atopischer Diathese und Typ-I-Allergien entwickeln signifikant häufiger eine Vaginalkandidose als andere [93]. Die klinischen Zeichen der Vaginalkandidose, wie Rötung und Juckreiz, werden besonders bei Rezidiven als Ausdruck allergischer Phänomene gesehen [133, 156].

Frauen mit der Vorgeschichte einer rezidivierenden *Candida*-Vaginitis exprimieren im symptomfreien Intervall Hitzeschock-Proteine, die ähnliche immunologische Abwehrreaktionen auslösen können wie *Candida*-Zellen [49, 110].

Psychosozialer Stress kann vermutlich über eine Immunsuppression eine CRVVC auslösen [35, 87]. Umgekehrt übt die CRVVC einen großen negativen Einfluss auf das Arbeits- und Sozialleben der Patientin aus [85].

Da Infektion gleich Kolonisation plus Disposition ist (die Kandidose ist die Erkrankung der Erkrankten), bekommen insbesondere immunsupprimierte Menschen eine Kandidose. Auch 75% der anscheinend ansonsten gesunden Frauen entwickeln wenigstens einmal im Leben eine Vulvovaginalkandidose, und es leiden viele von ihnen unter mehr als 4 Episoden pro Jahr (chronisch rezidivierende Vulvovaginalkandidose/CRVVC) [23, 133]. Mit einer Internetumfrage an 6000 Frauen in 5 europäischen Ländern und den USA gaben je nach Land 30–50% der Frauen an, wenigstens einmal eine Vulvovaginalkandidose gehabt zu haben, und etwa 9% hatten wenigstens für einige Jahre lang an einer CRVVC gelitten [45]. Dabei konnte aber kein Zusammenhang zwischen der Frequenz von Antibiotikaverschreibungen und chronisch rezidivierenden Vulvovaginalkandidosen gefunden werden.

## 7 Klinische Symptomatik

Entsprechend dem Östrogeneinfluss leiden prämenopausale Frauen gewöhnlich primär unter einer Vaginalkandidose, die sich auch auf die Vulva ausdehnen kann, und postmenopausale Frauen primär unter einer Vulva- und/oder Interkruralkandidose.

Die klinischen Zeichen treten typischerweise prämenstruell auf: die von Östrogenen induzierte Zellproliferation und von Progesteron induzierte Zytolyse setzt Glykogen frei, das von Laktobazillen verstoffwechselt werden kann, sodass der Zuckerspiegel der Vagina erhöht ist [34].

In etwa 90% ist der Juckreiz das wichtigste, jedoch nicht verlässliche Symptom, da nur 35 bis 40% der Frauen, die Juckreiz beklagen, eine Vaginalkandidose haben [2, 81, 152].

Der Ausfluss kann sehr unterschiedlich und dünnflüssig (oft zu Beginn einer akuten Vaginalkandidose) bis flockig sein, oder bei

CRVVC oft gänzlich fehlen [137]. Es gibt eine Einteilung der Vulvovaginalkandidosen aus klinischer und therapeutischer Sicht in komplizierte und unkomplizierte Fälle [133]. Allerdings werden die darin zur Abgrenzung erwähnten Pseudohyphen nicht immer in allen Fällen sogenannter unkomplizierter Kandidosen mikroskopisch gefunden.

Die meisten Patienten beklagen vaginale Rötung, Wundheitsgefühl, Brennen, Dyspareunie und Dysurie. Diese Symptome alleine erlauben es dem Kliniker allerdings nicht, verlässlich zwischen den Ursachen einer Vaginitis zu unterscheiden. Andererseits fehlen bei der Vaginalkandidose sehr selten der Juckreiz und die Rötung [2]. Der Fluor riecht nicht unangenehm im Gegensatz zu dem der bakteriellen Vaginose. Die kleinen Labien können ödematös sein und besonders bei CRVVC kommen brennende Rhagaden vor.

Aus dermatologischer Sicht wird die Vulvakandidose in eine vesikulöse, eine ekzematoide und eine folliculäre (der Haarfollikel) Form unterschieden (nach [82]).

Bei schweren Fällen kann eine dicke Fluorschicht an der Vaginalwand adhären sein, die beim Abwischen zu kleinen Blutungen führen kann.

Die *Candida*-glabrata-Vaginitis ist selten und kommt gewöhnlich in der späteren prä- und peripausalen Zeit vor [42, 55, 76, 132, 138]. Die *Candida*-krusei-Vaginitis [129], die *Candida*-parapsilosis-Vaginitis [97] und als Rarität die *Saccharomyces-cerevisiae*-Vaginitis [83, 123, 131] sind meist ähnlich wie die *Candida*-glabrata-Vaginitis mit nur milden klinischen Symptomen und Beschwerden verbunden.

Es gibt keine *Candida*-Zervizitis.

Frauen mit CRVVC sind in ihrer mit etablierten Evaluationskriterien gemessenen Lebensqualität und ihrem Gesundheitsstatus signifikant gegenüber der Normalbevölkerung beeinträchtigt, vergleichbar mit Asthma oder chronisch obstruktiver Bronchitis, und weisen eine signifikant reduzierte Produktivität im Berufs- und Alltagsleben auf [1].

## 8 Diagnostik

Die Diagnose der Vaginalkandidose wird immer durch die Kombination von Anamnese, den klinischen Zeichen und durch den Nachweis von Hefepilzen gestellt. Die klinische Diagnose kann schwierig sein, denn trotz *Candida*-Nachweis bei z. B. Juckreiz im Introitus muss nicht eine Vulvovaginalkandidose vorliegen. In einer prospektiven Studie zur Genauigkeit der klinischen Diagnose von bakterieller Vaginose, Trichomoniasis oder Vulvovaginalkandidose bei 535 Soldatinnen mit vulvovaginalen Beschwerden betrug die Sensitivität und Spezifität der Diagnose mit klassischer Diagnostik (Anamnese, vaginaler Untersuchung, pH-Wert, Mikroskopie des Nativpräparats) 83,8 bzw. 84,8% [70] und entsprechen somit früheren Ergebnissen von Müller et al. [90], während mit PCR *Candida* in 20,9% aller Frauen gegenüber 14% nachgewiesen werden konnte.

### 8.1 Notwendige Diagnostik

Essenziell sind die Anamnese, die gynäkologische Untersuchung und die mikroskopische Untersuchung des Fluors mit Kochsalzlösung oder 10%iger KOH-Lösung bei 400-facher Vergrößerung im Licht- bzw. besser Phasenkontrastmikroskop [83, 91]. Gegebenenfalls erfolgt auch eine pH-Messung. Sprosszellen (Blastosporen) oder (Pseudo-)Hyphen können in etwa 50 bis 80% der Fälle der Vaginalkandidosen im Mikroskop gefunden werden [90, 133].

während sie bei Kolonisation nur in etwa der Hälfte der Fälle mikroskopisch gesehen werden. Es können, müssen aber nicht, vermehrt Leukozyten im Fluor gefunden werden. Falls keine Blastosporen oder (Pseudo-)Hyphen mikroskopisch gefunden werden können oder falls es sich um eine CRVVC oder einen komplizierten Fall handelt, ist eine kulturelle Untersuchung mit Artbestimmung notwendig [34, 57, 96].

Sabouraud-Glukose-Agar ist das typische Medium zur kulturellen Diagnostik. Allerdings gibt es ebenso empfindliche und verlässliche Medien, wie z. B. zur Differenzierung Chrom-Agar, Mikrostix-Candida oder andere.

Es ist möglich, dass bei einer Vaginalkandidose 2 oder mehr verschiedene Hefearten gleichzeitig kulturell identifiziert werden können, z. B. *Candida albicans* und *Candida glabrata*. Die Patientin leidet dann üblicherweise unter einer *Candida albicans*-Vaginitis, während nach einer Behandlung die meist resistente *Candida glabrata* in situ verbleibt. Diese ist dann meistens nur kolonisierend vorhanden und muss bei Beschwerdefreiheit nicht erneut therapiert werden.

Eine In-vitro-Empfindlichkeitstestung ist nicht erforderlich, allenfalls bei Nachweis von Non-*Candida albicans*-Arten und chronisch-rezidivierenden Verläufen.

## 8.2 Unsinnige Diagnostik

Serologische Tests werden als nicht nützlich für die Diagnose der Vulvovaginalkandidose angesehen, weil niedrige Antikörperspiegel bei den meisten Menschen im Blut gefunden werden können. Sie sind bei Frauen mit und ohne Vaginalkandidose demnach (z. B. bei intestinaler Kolonisation) messbar. Die oberflächliche Vaginalkandidose verursacht keine erhöhten Antikörperspiegel.

## 9 Therapie

Es gibt eine große Menge konventioneller und alternativer Therapiemöglichkeiten [154]. Polyene bilden Komplexe mit dem Ergosterol der Sprosspilzmembran und verändern so deren Permeabilität [124]. Azole verhindern die Bildung von Lanosterol zu Ergosterol der Hefezellmembran [106]. Ciclopiroxolamin behindert wichtige Enzyme, die Eisen benötigen, durch Chelatbildung [94].

### 9.1 Kolonisation

Die asymptomatische vaginale Kolonisation bedarf selbst bei hoher Keimzahl keiner Therapie, falls die Patientin immunkompetent ist und unter keiner CRVVC leidet.

### 9.2 Die Kolonisation während der Schwangerschaft

Fast alle der gesunden reifen Neugeborenen, die während der vaginalen Geburt von der mütterlichen Vagina mit *Candida albicans* kolonisiert worden sind, bekommen während des 1. Lebensjahrs mit einem Gipfel in der 2. bis 4. Lebenswoche einen „Mundsoor“ und/oder eine „Windeldermatitis“ [10, 11].

In Deutschland gibt es deshalb eine Empfehlung zur prophylaktischen Therapie der asymptomatischen *Candida*-Kolonisation in den letzten Wochen der Schwangerschaft, um beim Neugeborenen während der vaginalen Geburt die Kolonisation und nachfolgende Infektionen zu verhindern. Dadurch wird das Risiko von Mundsoor und Windeldermatitis signifikant von ca. 10% auf ca. 2% in der 4. Lebenswoche reduziert [10, 84, 125].

In retrospektiven [24–26, 54] und in einer prospektiv randomisierten Studie [63] wurde überraschend eine signifikante Reduk-

Tab. 4 Antimykotika gegen Vulvovaginalkandidosen.

|                                                                                                                                                                                                                                                                                                                                                                                                                                                                             |
|-----------------------------------------------------------------------------------------------------------------------------------------------------------------------------------------------------------------------------------------------------------------------------------------------------------------------------------------------------------------------------------------------------------------------------------------------------------------------------|
| Polyene (seit ca. 1960):                                                                                                                                                                                                                                                                                                                                                                                                                                                    |
| ▶ Nystatin-Vaginaltabletten oder -Vaginalzäpfchen 100 000 I. E., 200 000 I. E. zur 6-Tage-Therapie, Nystatin-Creme, Nystatin-Salbe                                                                                                                                                                                                                                                                                                                                          |
| ▶ Amphotericin B (in Deutschland für vaginale Therapie nicht mehr im Handel)                                                                                                                                                                                                                                                                                                                                                                                                |
| Imidazole (seit ca. 1970):                                                                                                                                                                                                                                                                                                                                                                                                                                                  |
| ▶ Clotrimazol, Miconazolnitrat, Econazolnitrat, Fenticonazolnitrat u. a. als Vaginaltabletten, Vaginalovula, Vaginalcremulum, Vaginalcreme, als Hautcreme (für Vulva oder Perianalregion), z. B. zur 1-Tag-Therapie 500 mg Clotrimazol-Vaginaltablette oder 600 mg Fenticonazolnitrat-Vaginalovulum, als 3-Tage-Therapie z. B. Clotrimazol 200 mg Vaginaltabletten oder 2% Vaginalcreme, als 6-Tage-Therapie 100 mg Clotrimazol Vaginaltabletten oder 1% Vaginalcreme, usw. |
| orales Imidazol (seit ca. 1980):                                                                                                                                                                                                                                                                                                                                                                                                                                            |
| ▶ Ketoconazol (in Deutschland nicht mehr im Handel)                                                                                                                                                                                                                                                                                                                                                                                                                         |
| Triazole (seit ca. 1990):                                                                                                                                                                                                                                                                                                                                                                                                                                                   |
| ▶ Fluconazol 150 mg Hartkapseln zur 1-Tag-Therapie, Fluconazol 50 mg, 100 mg, 200 mg Kapseln                                                                                                                                                                                                                                                                                                                                                                                |
| ▶ Itraconazol Hartkapseln 100 mg, 2 × 200 mg als 1-Tag-Therapie                                                                                                                                                                                                                                                                                                                                                                                                             |
| Ciclopiroxolamin (für gynäkologische Therapie seit ca. 1995):                                                                                                                                                                                                                                                                                                                                                                                                               |
| ▶ Vaginalcreme 10 mg/g: 50 mg täglich für 6 Tage                                                                                                                                                                                                                                                                                                                                                                                                                            |

tion von Frühgeburten nach einer vaginalen Behandlung mit Clotrimazol im 1. Trimester der Schwangerschaft festgestellt, während in einer australischen Studie bei relativ kleinen Fallzahlen nur eine nicht signifikante Tendenz zur Reduktion von Frühgeburten nach Clotrimazol im 1. Trimester zu beobachten war [115]. Es wird diskutiert, ob Non-*Candida albicans*-Arten, inflammatorische Zytokine durch *Candida* in der Scheide oder eher die antibakterielle Komponente von Clotrimazol gegen grampositive Kokken die entscheidende Rolle spielen. Weitere prospektive Studien sind deshalb nötig.

Bisher wurden seit Einführung der Triazole um 1990 keine neonatalen Missbildungen nach Einnahme im 1. Trimenon beobachtet [24, 73]. Nach einer dänischen Studie ist die Einnahme von Fluconazol in den gynäkologisch üblichen Dosen von 150–300 mg/d in der gesamten Schwangerschaft unschädlich. Allerdings trat nach (streng medizinisch indizierter) Einnahme von kumulativ 150–6000 mg Fluconazol im 1. Trimenon in einer Kohorte von 7352 Schwangeren 7-mal eine Fallot'sche Tetralogie auf, während im Kontrollkollektiv von 968236 Schwangeren, die kein Fluconazol im 1. Trimenon bekommen hatten, dies statistisch signifikant seltener vorgekommen war [88].

### 9.3 Therapie der akuten Vulvovaginalkandidose

Die akute Vulvovaginalkandidose kann lokal mit Polyenen (Nystatin, Amphotericin B) oder Imidazolen (z. B. Clotrimazol, Miconazol-Nitrat, Econazol-Nitrat, Fenticonazol-Nitrat) [77, 133], oder mit Ciclopiroxolamin [148] behandelt werden (► Tab. 4).

Es gibt Vaginalsuppositorien oder Vaginalcremes mit Dosierungen und Zubereitungen für Behandlungsdauern, die zwischen 1 Tag oder 3 Tagen oder 6 oder 7 Tagen liegen und für die Patientin gefahrlos sind [114].

Es ist aber auch die orale Behandlung mit den Triazolen Fluconazol oder Itraconazol möglich.

Die mykologischen und klinischen Heilungsergebnisse nach den verschiedenen geprüften Therapieverfahren sind außerhalb der Schwangerschaft gleich gut und bewegen sich zwischen ungefähr 85% 1 bis 2 Wochen und 75% 4 bis 6 Wochen nach Behandlungsende [22, 80, 95, 105, 134].

Die Heilungsergebnisse während der Schwangerschaft sind mit Imidazolen signifikant besser als mit Polyenen [160].

Falls die Kandidose die Region der Vulva außerhalb des Introitus vaginae oder die Inguinalregion mit einschließt, ist eine antimykotische Hautcreme, z.B. Clotrimazol, für eine Behandlungsdauer von etwa einer Woche 2-mal täglich empfehlenswert. Die kombinierte Behandlung der akuten Vulvovaginalkandidose intravaginal und zusätzlich mit Creme für die Vulva scheint günstigere Heilungsergebnisse zu erzielen als die intravaginale Therapie alleine. Allerdings liegen dazu kaum Studien vor [86, 108].

Die „blinde“ Behandlung des asymptomatischen Sexualpartners ist für die Patientin ohne Nutzen [9, 14, 133]. Studien zur Frage, ob die Mitbehandlung des am Penis oder im Sperma kolonisieren, aber asymptomatischen Partners einen Nutzen für die Patientin hat, sind nicht bekannt.

Die vaginale Kandidose ist bei HIV-positiven Frauen deutlich häufiger (● **Abb. 1**). In der HIV-Leitlinie zur Behandlung von opportunistischen Infektionen wird auf die Problematik und möglichen Therapieprobleme hingewiesen [141]. Sexualpartner von solchen Frauen sollten bei eigener Disposition zu Candida-Balanitis auf die erhöhte Infektionsgefahr aufmerksam gemacht werden.

#### 9.4 Nebenwirkungen

Alle vaginalen bzw. lokalen Antimykotika werden gut toleriert. Azole und Ciclopiroxolamin können in 1 bis 10% der Fälle leichtes lokales Brennen verursachen [77,80]. Allergische Reaktionen sind möglich, aber eine Seltenheit.

Das hydrophile Fluconazol und das lipophile Itraconazol verursachen bei den üblichen Dosierungen selten Nebenwirkungen. Bei der systemischen Therapie verursacht Itraconazol aber deutlich mehr Nebenwirkungen als Fluconazol (z.B. anaphylaktoide Reaktionen, Kopfschmerzen u. a.).

#### 9.5 Resistenz von *Candida albicans*?

Obwohl vaginale *Candida albicans*-Stämme mit höheren minimalen Hemmkonzentrationen gegen Fluconazol gefunden wurden [112], sind Fälle von Azol-Resistenz bei vaginaler Kandidose eine Rarität [74, 112].

Klinische Resistenz korreliert nicht mit minimalen Hemmkonzentrationen und umgekehrt. Deshalb werden Resistenztests üblicherweise hier nicht empfohlen [133], es sei denn, es handelt sich um Non-*Candida albicans*-Arten.

Allerdings sollte eine Empfindlichkeitstestung in einem mykologisch erfahrenen Labor veranlasst werden, wenn unter lang dauernder Chemoprophylaxe mit Fluconazol eine *Candida albicans*-Vulvovaginitis durchbricht [127].

#### 9.6 Non-*Candida albicans*-Vaginitis

Die übliche vaginale oder orale Behandlung versagt gewöhnlich bei der *Candida glabrata*-Vaginitis. Sobel et al. [136] empfahlen deshalb 600 mg vaginale Borsäurezäpfchen für 14 Tage, und Phillips [101] Amphotericin-B-Ovula. In therapieresistenten Fällen soll auch eine 2-wöchige vaginale Behandlung mit 17% Flucytosin in 90% der Fälle erfolgreich sein [136]. Borsäure ist aber in Deutschland nicht erlaubt und vaginale Flucytosin-Zubereitungen sind in Deutschland nicht verfügbar. Deshalb wurde vor einigen Jahren noch empfohlen, täglich 800 mg Fluconazol oral für 2 bis 3 Wochen gegen die *Candida glabrata*-Vaginitis (nicht die Kolonisation!) einzunehmen [65,82]. Allerdings wurden zunehmend auch mit dieser Behandlung Versager beobachtet. Deshalb empfahl Tietz [143] die orale Gabe von Posaconazol zusammen

mit einer Lokalthherapie mit Ciclopiroxolamin und/oder Nystatin für 15 Tage aufgrund Heilung bei 14 von 15 seiner Patientinnen. Doch beobachtete er auch damit schnell entstandene Resistenzen und Therapieversager. Deshalb beschrieb er erfolgreiche Therapien bei 14 Patientinnen mit *Candida glabrata*-Infektionen der Vagina aus mehreren deutschen Universitäten und seinem Institut mit Micafungin, einem Echinocandin, das für lebensbedrohliche Mykosen z.B. in der Hämatookologie zugelassen ist [144]. Solche Maßnahmen sind nur als Ausnahme bei signifikanten Beschwerden vertretbar, denn hierbei handelt es sich um eine nicht zugelassene Therapie, „off-label use“.

Die *Candida krusei*-Vaginitis ist gegen Fluconazol und Flucytosin resistent, jedoch können lokal Clotrimazol oder Ciclopiroxolamin [83,144] oder (z.B. in den USA) Borsäure angewendet werden [129]. Auch Nystatin versagt oft. Entsprechend der Seltenheit solcher Fälle gibt es keine Studienergebnisse. Es liegen auch keine Vergleichsstudien zwischen Antimykotika und Antiseptika vor. Dequaliniumchlorid ist *in vitro* wirksam [15], Octenidin und andere sind zumindest als Alternative bei akuten Vulvovaginalkandidosen erprobt [46,47].

#### 9.7 Die chronisch rezidivierende *Candida albicans*-Vulvovaginitis

Da Infektion gleich Kolonisation plus Disposition ist und eine Therapie gegen die Disposition (die immunologische lokale Schwäche) bisher nicht erprobt ist, werden lokale oder orale Erhaltungstherapien empfohlen, um Rückfälle zu vermeiden [27, 119, 130, 134].

Die Ergebnisse sind alle vergleichbar, ob nun lokal Clotrimazol 500 mg, oral Ketoconazol 100 mg oder Fluconazol 150 mg gegeben wurden, doch tritt ein Rückfall bei der Hälfte der Patientinnen bereits kurz nach Beendigung der Therapie auf [130, 134]. In einer placebokontrollierten Studie mit einem randomisierten Kollektiv von 387 Frauen, die 150 mg Fluconazol wöchentlich für 6 Monate bekamen, war die Gruppe der krankheitsfreien Frauen nach 12 Monaten 42,9% in der Fluconazolgruppe und 21,9% in der Placebogruppe [134]. Die CRVC ist somit einer nicht heilbaren chronischen Erkrankung vergleichbar [33].

Die von Donders et al. [31] empfohlene Therapie bzw. Prophylaxe mit einer Initialdosis von  $3 \times 200$  mg Fluconazol in der 1. Woche, gefolgt von einem die Dosis reduzierenden Erhaltungsregime (● **Abb. 2**) ist vorteilhaft, weil dabei fast 90% der Patientinnen nach 6 Monaten und 77% der Patientinnen nach 1 Jahr krankheitsfrei waren. Die kumulative Gesamtdosis beträgt 3800 mg Fluconazol in 6 Monaten und 5000 mg im Jahr beim Schema nach Donders. Bei Einnahme von 150 mg Fluconazol/Woche beträgt sie nach 6 Monaten 3600 mg, aber nach einem Jahr 7200 mg Fluconazol mit etwa gleichen Therapieergebnissen.

Es sollte in Erwägung gezogen werden, bei Frauen mit rezidivierender Vulvovaginalkandidose ein liegendes Intrauterinpressar zu entfernen, da bei Levonorgestrel-haltigen Intrauterinpressaren von solchen Frauen signifikant häufiger als bei Frauen ohne Rezidive histologisch und kulturell *Candida albicans* am Kunststoff haftend gefunden wurde. Erst nach Entfernen des IUD unter Fluconazoltherapie wurden diese Frauen für längere Zeit rezidivfrei [161].



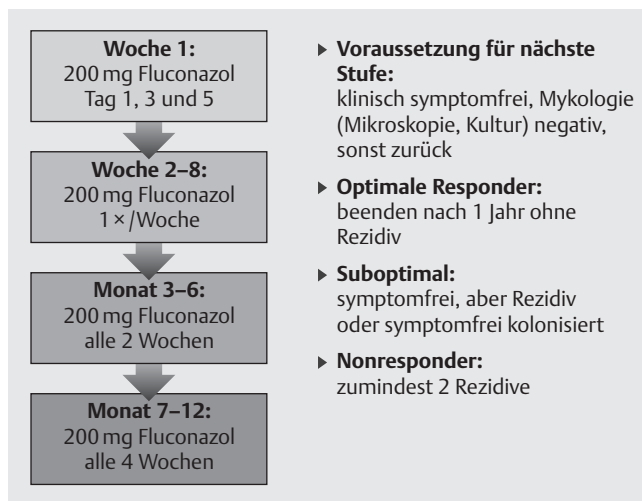

**Abb. 2** Individualisierte, dosisreduzierende Erhaltungstherapie mit Fluconazol bei chronisch rezidivierender Vulvovaginalkandidose [31].

## 10 Offene Fragen

Es bleiben zahlreiche Fragen. Warum und wie versagt die Immunabwehr in der Vagina bei einigen Frauen und erlaubt nach einer akuten Vaginalkandidose den Ausbruch von rezidivierenden Infektionen oder Inflammationen?

Antimykotika sind jedenfalls nicht die Lösung und führen in solchen Fällen nur zur akuten Symptomverbesserung.

Welche Rolle spielen rezidivierende Candida-Infektionen der Vulva oder Vagina bei der Entstehung der Vestibulodynie? Viele Frauen mit provozierte sekundärer Vestibulodynie berichten von Vulvovaginalkandidosen vor Ausbruch der vestibulären Schmerzen, und in einem Tierversuch konnte ein signifikanter Zusammenhang mit vulvovaginalen Candida-Infektionen und Vestibulodynie sowie Einsprossung ungewöhnlich vieler und dickerer Nerven in die oberflächlichen Epithelschichten mit signifikanten immunhistochemischen Veränderungen dargestellt werden [37].

### 10.1 Ansätze zu immunologischen Therapien

Es gibt bis jetzt noch keine zufriedenstellende Immuntherapie für die chronisch rezidivierende Vaginalkandidose, obwohl schon vor über 30 Jahren Rosedale und Brown [118] ermutigende erste Ergebnisse mit einer Hyposensibilisierung berichtet hatten. In-vitro-Studien mit einem autologen membrangebundenen Candida-albicans-Antigen einer Patientin mit chronisch rezidivierender Candida-albicans-Vaginitis und deren T-Lymphozyten ergaben bessere immunologische Reaktionen als mit kommerziellen Candida-Antigenen [64]. Rigg et al. [113] berichteten über eine Candida-Allergentherapie und Moraes et al. [89] und Rusch und Schwiertz [121] über Ergebnisse mit einer Candida-Autovakzination, die aber nur die allergoide Komponente im Sinn einer Desensibilisierung betrifft. Allerdings ist ein therapeutischer Durchbruch in dieser Hinsicht ausgeblieben, obwohl viele Untersuchungen zum Verständnis der Immunpathogenese der Candida-Vaginitis durchgeführt worden sind [5, 7, 17, 41, 59, 78, 93, 151, 155, 156, 158].

Die intramuskuläre Injektion von nicht H<sub>2</sub>O<sub>2</sub>-bildenden, „aberrierenden“ Laktobazillen, die eine Antikörperbildung und unspezifische Immunreaktionen induziert und primär gegen Trichomoniasis und bakterielle Vaginose erfolgreich eingesetzt werden kann, führt bei chronisch rezidivierenden Vulvovaginalkandidosen zu keiner Reduktion der Rezidive, wohl aber zu einer signifikanten Verbesserung von einzelnen in der Literatur etablierten Scores der körperlichen und seelischen Leistungsfähigkeit [85].

Neben zahlreichen Ansätzen, Antikörperbildung gegen systemische Kandidosen zu induzieren, sind derzeit 2 Impfstoffe gegen Mund- bzw. Vulvovaginalkandidosen in die Nähe erster klinischer Erprobung gerückt: der eine ist gegen den wichtigsten Virulenzfaktor von Candida albicans gerichtet, die sekretorische Aspartatprotease 2 (Sap 2), der andere gegen ein Zellwandantigen der Candida-Oberfläche, das Agglutinin-like sequence 3 protein Als3p. Beide führten in Tierversuchen und ersten Studien bei Menschen zu guter AK-Bildung mit der Hoffnung auf klinische Wirksamkeit, die nach Boosterung anhält [18, 146].

### 10.2 Bedeutung von Laktobazillen

Die orale Gabe von Probiotika mit spezifischen Laktobazillustämmen [36, 56, 61, 103] zeigten ermutigende, aber auch kontroverse Ergebnisse, die zukünftig weiterer Untersuchungen bedürfen. Es sind jedenfalls Laktobazillustämme identifiziert, die in vitro einen fungiziden bzw. immunstimulierenden Effekt haben [71], und andere, die in vivo nach Therapie einer Vulvovaginalkandidose die vaginale Kolonisation signifikant gegen Placebo verringern [72]. Andererseits hat die monatliche Zugabe von Laktobazillen für je 6 Tage zu Itraconazol 2 × 200 mg 1 Tag gegenüber Itraconazol allein über 6 Monate keine Verbesserung der Rezidivrate von chronisch rezidivierenden Vulvovaginalkandidosen ergeben. Diese Maßnahmen waren aber hochsignifikant besser als klassische Homöopathie [157].

### 10.3 Selbstmedikation (OTC-Therapie)?

Die Selbsttherapie („over-the-counter“ = OTC) der Vulvovaginalkandidose mit Clotrimazol, und in einigen Ländern auch mit Fluconazol, wird mittlerweile in weit mehr als 80% der Fälle betrieben. Die ersten hoffnungsvollen Erwartungen der frühen 90er-Jahre des vorigen Jahrhunderts aufgrund von Mitteilungen, dass die Patientinnen fast immer ihre Vaginalkandidose selbst korrekt diagnostizieren könnten, sind (zumindest heute) offensichtlich nicht richtig [6, 57, 149]. Nur ein Drittel von 95 Frauen, die vaginale Antimykotika zur Selbsttherapie gekauft hatten, litten tatsächlich an einer Candida-Vaginitis [39]. Es ist deshalb wieder empfehlenswert, nur nach einer korrekten medizinischen Diagnose zu behandeln.

## 11 Zukünftige Forschung

Es gibt noch zahlreiche Lücken im Wissen über die Candida-Wirts-Interaktionen, die weiterer Forschung bedürfen. Wie kann beispielsweise gegen Virulenzfaktoren von Candida albicans vorgegangen werden oder wie kann die Adhäsion von Candida-Zellen am Vaginalepithel gehemmt werden? Wie kann die Abwehrkraft der Vagina verbessert werden (z.B. T-Lymphozyten-Stimulation, humorale Faktoren. Allergie)? Ist eine Impfung gegen Candida möglich? Welche neuen Antimykotika sind in der Lage, Candida glabrata oder Candida krusei problemlos intravaginal zu behandeln? Welche Interaktionen von Candida mit der Vaginal-

flora gibt es, denn bei Vaginalkandidose wurde dargestellt, dass abnormale bakterielle Flora der Vagina zusammen mit Pseudo-hyphen in die Vaginalepithelien eindringt, was normalerweise bei bakteriellen Vaginalstörungen nicht der Fall ist [139]. Warum gibt es nach Behandlung mit Clotrimazol in der Frühschwangerschaft weniger Frühgeburten?

### Institute

- <sup>1</sup> Deutsches Zentrum für Infektionen in Gynäkologie und Geburtshilfe, Wuppertal
- <sup>2</sup> Klinikum der Universität München, Klinik und Poliklinik für Frauenheilkunde und Geburtshilfe, München
- <sup>3</sup> Premium Medizin, München
- <sup>4</sup> Universitätsklinikum Kiel, Klinik für Dermatologie, Kiel
- <sup>5</sup> Universitäts-Hautklinik Tübingen, Tübingen
- <sup>6</sup> Universitätsklinikum Giessen, Klinik für Dermatologie, Venerologie und Allergologie, Giessen
- <sup>7</sup> Klinikum Bielefeld, Hautklinik, Bielefeld
- <sup>8</sup> Universitätsklinik für Dermatologie und Venerologie Graz, Graz, Österreich
- <sup>9</sup> Labor Limbach, Heidelberg
- <sup>10</sup> Uniklinik Köln, Klinik I für Innere Medizin, Köln
- <sup>11</sup> Medizinische Klinik mit Schwerpunkt Onkologie und Hämatologie, Charité, Berlin

### Literatur

- 1 *Aballéa S, Guelfucci F, Wagner J et al.* Subjective health status and health-related quality of life among women with Recurrent Vulvovaginal Candidosis (RVVC) in Europe and the USA. *Health Qual Life Outcomes* 2013; 11: 169–173
- 2 *Anderson MR, Klink K, Cohn A.* Evaluation of vaginal complaints. *JAMA* 2004; 291: 1368–1379
- 3 *Auger P, Joly J.* Microbial flora associated with candida albicans vulvovaginitis. *Am J Obstet Gynecol* 1980; 55: 397–401
- 4 *Auler ME, Morreiva D, Rodriguez FF, et al.* Biofilm formation on intrauterine devices in patients with recurrent vulvovaginal candidiasis. *Med Mycol* 2010; 48: 211–216
- 5 *Babula O, Lazdane G, Kroica J et al.* Frequency of interleukin-4 (IL-4)-589 gene polymorphism and vaginal concentrations of IL-4, nitric oxide, and mannose-binding lectin in women with recurrent vulvovaginal candidiasis. *Clin Infect Dis* 2005; 40: 1258–1262
- 6 *Beigi RH, Meyn LA, Moore DM et al.* Vaginal yeast colonization in non-pregnant women: a longitudinal study. *Obstet Gynecol* 2004; 104: 926–930
- 7 *de Bernardis F, Agatensi L, Ross IK et al.* Evidence for a role for secretory aspartate proteinase of *Candida albicans* in vulvovaginal candidosis. *J Infect Dis* 1990; 161: 1276–1283
- 8 *de Bernardis F, Boccanera M, Cassone A.* The Role of Immunity against vaginal *Candida* Infection. In: Fidel PL, Huffnagle GB, eds. *Fungal Immunity: from an Organ Perspective*. Heidelberg, New York: Springer; 2005: 345–355
- 9 *Bisschop MP, Merkus JM, Scheygrond H et al.* Co-treatment of the male partner in vaginal candidosis: a double-blind randomized control study. *Br J Obstet Gynaecol* 1986; 93: 79–81
- 10 *Blaschke-Hellmessen R.* Subpartale Übertragung von *Candida* und ihre Konsequenzen. Vertical transmission of candida and its consequences. *Mycoses* 1998; 41 (Suppl. 2): 31–36
- 11 *Blaschke-Hellmessen R.* Epidemiologische Untersuchungen zum Vorkommen von Hefepilzen bei Kindern und deren Müttern. *Mykosen* 1968; 11: 611–616
- 12 *Bohanna NJ.* Treatment of vulvovaginal candidiasis in patients with diabetes. *Diabetes Care* 1998; 21: 451–456
- 13 *Bond CM, Watson MC; Grampian Evidence Based Community Pharmacy Guidelines Group.* The development of evidence-based guidelines for over-the-counter treatment of vulvovaginal candidiasis. *Pharm World Sci* 2003; 25: 177–181
- 14 *Buch A, Skytte Christensen E.* Treatment of vaginal candidosis with natamycin and effect of treating the partner at the same time. *Acta Obstet Gynecol Scand* 1982; 61: 393–396
- 15 *della Casa V, Noll H, Gonser S et al.* Antimicrobial activity of dequalinium chloride against leading germs of vaginal infections. *Arzneimittelforsch* 2002; 52: 699–705
- 16 *Cassone A, de Bernardis F, Mondell F et al.* Evidence for a correlation between proteinase secretion and vulvovaginal candidosis. *J Infect Dis* 1987; 156: 777–782
- 17 *Cassone A, de Bernardis F, Torosantucci A.* An outline of the role of anti-candida antibodies within the context of passive immunization and protection from candidiasis. *Curr Mol Med* 2005; 5: 377–382
- 18 *Cassone A, Casadevall A.* Recent progress in vaccines against fungal diseases. *Curr Opin Microbiol* 2012; 4: 427–433
- 19 *Cetin M, Ocak S, Gungoren A et al.* Distribution of *Candida* species in women with vulvovaginal symptoms and their association with different ages and contraceptive methods. *Scand J Infect Dis* 2007; 39: 584–588
- 20 *Chaim W, Foxman B, Sobel JD.* Association of recurrent vaginal candidiasis and secretory ABO and Lewis phenotype. *J Infect Dis* 1997; 176: 828–830
- 21 *Chassot F, Negri MF, Swidsinski AF et al.* Can intrauterine contraceptive devices be a *Candida albicans* reservoir? *Contraception* 2008; 77: 355–359
- 22 *Cohen L.* Is more than one application of an antifungal necessary in the treatment of an acute vaginal candidosis? *Am J Obstet Gynecol* 1985; 152: 961–964
- 23 *Corsello S, Spinillo A, Osnengo G et al.* An epidemiological survey of vulvovaginal candidiasis in Italy. *Eur J Obstet Gynecol Reprod Biol* 2003; 110: 66–72
- 24 *Czeizel AE, Tóth M, Rockenbauer M.* No teratogenic effect after clotrimazole therapy during pregnancy. *Epidemiology* 1999; 10: 437–440
- 25 *Czeizel AE, Fladung B, Varga P.* Preterm birth reduction after clotrimazole treatment during pregnancy. *Eur J Obstet Gynecol Reprod Biol* 2004; 116: 157–163
- 26 *Czeizel AE, Puhó EH, Kazy Z.* The use of data set of the Hungarian case-control surveillance of congenital abnormalities for evaluation of birth outcomes beyond birth defects. *Centr Eur J Public Health* 2007; 15: 147–153
- 27 *Davidson F, Mould RF.* Recurrent vaginal candidosis in women and the effect of intermittent prophylactic treatment. *BJ Vener Dis* 1978; 54: 176–183
- 28 *Davidson F, Oates JK.* The pill does not cause 'thrush'. *Br J Obstet Gynaecol* 1985; 92: 1265–1266
- 29 *Dennerstein GJ, Ellis DH.* Oestrogen, glycogen and vaginal candidiasis. *Aust N Z J Obstet Gynaecol* 2001; 41: 326–328
- 30 *Donders G, Babula O, Bellen G et al.* Mannose-binding lectin gene polymorphism and resistance to therapy in women with recurrent vulvovaginal candidiasis. *BJOG* 2008; 115: 1223–1231
- 31 *Donders G, Bellen G, Byttebier G et al.* Individualized decreasing dose maintenance fluconazole regimen for recurrent vulvovaginal candidiasis (ReCiDiF trial). *Am J Obstet Gynecol* 2008; 199: 613.e1–613.e9
- 32 *Donders G, Prenen H, Verbeke G et al.* Impaired tolerance for glucose in women with recurrent vaginal candidiasis. *Am J Obstet Gynecol* 2002; 187: 989–993
- 33 *Donders GG, Bellen G, Mendling W.* Management of recurrent vulvovaginal candidosis as a chronic illness. *Gynecol Obstet Invest* 2010; 70: 306–321
- 34 *Eckert LO, Hawes SE, Stevens CE et al.* Vulvovaginal candidiasis: clinical manifestations, risk factors, management algorithm. *Obstet Gynecol* 1998; 92: 757–765
- 35 *Ehrström SM, Kornfeld D, Thuresson J et al.* Signs of chronic stress in women with recurrent candida vulvovaginitis. *Am J Obstet Gynecol* 2005; 193: 1376–1381
- 36 *Falagas ME, Betsi GI, Athanasiou S.* Probiotics for prevention of recurrent vulvovaginal candidiasis: a review. *A Antimicrob Chemother* 2006; 58: 266–272
- 37 *Farmer MA, Taylor AM, Bailey AL et al.* Repeated vulvovaginal fungal infections cause persistent pain in a mouse model of vulvodynia. *Sci Transl Med* 2011; 3: 101ra91
- 38 *Farrell SM, Hawkins DF, Ryder TT.* Scanning electron microscope study of *Candida albicans*, invasion of cultural human cervical epithelial cells. *Sabouraudia* 1983; 25: 251–254
- 39 *Ferris GD, Nyirjesy P, Sobel JD et al.* Over-the-counter antifungal drug misuse associated with patient-diagnosed vulvovaginal candidiasis. *Obstet Gynecol* 2002; 99: 419–425
- 40 *Ferwerda B, Ferwerda B, Platinga TS et al.* Human lectin-1 deficiency and mucocutaneous fungal infections. *N Engl J Med* 2009; 361: 1760–1767
- 41 *Fidel PL jr.* Immunity in vaginal candidiasis. *Curr Opin Infect Dis* 2005; 18: 107–111

- 42 Fidel PL jr., Vazquez JA, Sobel JD. Candida glabrata: review of epidemiology, pathogenesis, and clinical disease with comparison to C. albicans. Clin Microbiol Rev 1999; 12: 80–96
- 43 Fong JW. The value of chronic suppressive therapy with itraconazole versus clotrimazole in women with recurrent vaginal candidiasis. Genitourin Med 1992; 68: 374–377
- 44 Foxman B. The epidemiology of vulvovaginal candidiasis: risk factors. Am J Public Health 1990; 80: 329–331
- 45 Foxman B, Muraglia R, Dietz JP et al. Prevalence of recurrent vulvovaginal candidiasis in 5 European countries and the United States: results from an internet panel survey. Low Genit Tract Dis 2012; 17: 1–6
- 46 Friese K, Neumann G, Siebert J. Topical antiseptics as an alternative in the treatment of acute vulvovaginal candidosis. Arch Gynecol Obstet 2003; 268: 194–197
- 47 Frey Tirri B. Antimicrobial topical agents used in the vagina. Curr Probl Dermatol 2011; 40: 36–47
- 48 Gaspard U, Scheen A et al. Randomized study over 13 cycles to assess the influence of oral contraceptives containing ethinylestradiol combined with drospirenone or desogestrel on carbohydrate metabolism. Contraception 2003; 67: 423–429
- 49 Geraldo P, Neuer A, Korneeva IL et al. Vaginal heat shock protein expression in symptom-free women with history of recurrent vulvovaginitis. Am J Obstet Gynecol 1999; 180: 524–529
- 50 Ghannoum MA, Abu-El Teen. Pathogenicity determinants of Candida mycoses. 1990; 33: 265–282
- 51 Ghannoum MA. Potential role of phospholipases in virulence and fungal pathogenesis. Clin Microbiol Rev 2000; 13: 122–143
- 52 Goswami R, Dadhwal V, Tejaswi S et al. Species-specific prevalence of vaginal candidiasis among patients with diabetes mellitus and its relation to their glycaemic status. J Infect Dis 2000; 41: 162–166
- 53 Goswami D, Goswami R, Banerjee U et al. Pattern of Candida species isolated from patients with diabetes mellitus and vulvovaginal candidiasis and their response to single dose oral fluconazole therapy. J Infect 2006; 52: 111–117
- 54 Hay PH, Czeizel AE. Asymptomatic trichomonas and candida colonization and pregnancy outcome. Best Pract Res Clin Obstet Gynecol 2007; 21: 403–409
- 55 Hettiarachchi N, Ashbee HR, Wilson JD. Prevalence and management of non-albicans vaginal candidiasis. Sex Transm Infect 2010; 86: 99–100
- 56 Hilton E, Isenberg HD, Alperstein P et al. Ingestion of yogurt containing Lactobacillus acidophilus as prophylaxis for candidal vaginitis. Ann Intern Med 1992; 116: 353–357
- 57 Hoffstetter SE, Barr S, LeFevre C et al. Self-reported yeast symptoms compared with clinical wet mount analysis and vaginal yeast culture in a specialty clinic setting. J Reprod Med 2008; 53: 402–406
- 58 Holland S, Vinh D. Yeast infections – human genetics in the rise. N Engl J Med 2009; 361: 1798–1801
- 59 Ip WK, Lan YL. Role of mannose-binding lectin in the innate defense against Candida albicans: enhancement of complement activation, but lack of opsonic function, in phagocytosis by human dendritic cells. J Inf Dis 2004; 190: 632–640
- 60 Ismail A, Lupan DM. Utilisation of siderophores by Candida albicans. Mycopath 1986; 96: 109–113
- 61 Jeavons HS. Prevention and treatment of vulvovaginal candidosis using exogenous lactobacilli. J Obstet Gynecol Neonatal Nurs 2003; 32: 287–296
- 62 De Jong MA, Vriend LE, Theelen B et al. C-type lectin Langerhans is a beta-glucan receptor on human Langerhans cells that recognize opportunistic and pathogenic fungi. Mol Immunol 2010; 47: 1216–1225
- 63 Kiss H, Petricevic L, Husslein P. Prospective randomised controlled trial of an infection screening program to reduce the rate of preterm delivery. BMJ 2004; 329: 371–375
- 64 Koldowsky H, Kariger U, Mendling W. Herstellung eines autologen membranbundenen Candida-Antigens und in-vitro-Untersuchungen zu seinen immunologischen Reaktionen. In: Metzner G, Weissenbacher ER, Hrsg. Candida-Infektionen des weiblichen Genitaltraktes. München: Medifact; 1999: 25–32
- 65 Kunzelmann V, Tietz HJ, Roßner D et al. Voraussetzungen für eine effektive Therapie chronisch rezidivierender Vaginalkandidosen. Mycoses 1996; 39 (Suppl. 1): 65–72
- 66 Lattif AA, Prasard R et al. The glycolate cycle enzyme activities in the pathogenic isolates of Candida albicans obtained from HIV/AIDS, diabetic and burn patients. Mycoses 2006; 49: 85–89
- 67 de Leon E, Jacober SJ, Sobel JD et al. Prevalence and risk factors for vaginal Candida colonization in women with type 1 and type 2 diabetes. BMC Infect Dis 2002; 2: 1–6
- 68 Li J, Fan SR, Liu XP et al. Biased genotype distributions of Candida albicans strains associated with vulvovaginal candidosis and candidal balanoposthitis in China. Clin Infect Dis 2008; 47: 1119–1125
- 69 Loeffler W. Terminologie der Humanmykosen. Mykosen 1983; 26: 346
- 70 Lowe NK, Neal JL, Ryan-Wenger NA. Accuracy of the clinical diagnosis of vaginitis compared with a DNA probe laboratory standard. Obstet Gynecol 2009; 113: 89–95
- 71 Mailänder-Sánchez D, Wagener J et al. Potential role of probiotic bacteria in the treatment and prevention of localised candidosis. Mycoses 2012; 55: 17–26
- 72 Martinez RC, Seney SL, Summers KL et al. Effect of Lactobacillus rhamnosus GR-1 and Lactobacillus reuteri RC-14 on the ability of Candida albicans to infect cells and induce inflammation. Microbiol Immunol 2009; 53: 487–495
- 73 Mastroiacovo P, Mazzone T, Botto LD. Prospective assessment of pregnancy outcome after first-trimester exposure to fluconazole. Am J Obstet Gynecol 1996; 176: 1645–1650
- 74 Mathema B, Cross E, Dun E et al. Prevalence of vaginal colonization by drug-resistant candida species in college-age women with previous exposure to over-the-counter azole antifungals. Clin Inf Dis 2001; 33: E23–E27
- 75 Meinhof W. Die Salzsäure-Toleranz von Candida albicans. Mykosen 1974; 17: 339–347
- 76 Mendling W. Die Torulopsidose in der Frauenheilkunde. Geburtsh Frauenheilk 1984; 44: 583–586
- 77 Mendling W. Azoles in the Therapy of vaginal Candidosis. In: Berg D, Plempel M, eds. Sterol Biosynthesis Inhibitors. Chichester: Ellis Horwood; 1988: 480–506
- 78 Mendling W, Koldovsky U. Investigations by cell-mediated immunologic tests of therapeutic trials with thymopentin in vaginal mycoses. Inf Dis Obstet Gynecol 1996; 4: 225–231
- 79 Mendling W, Gutschmidt J, Gantenberg R et al. Vergleich der Stammspezifität von Hefepilzen verschiedener Lokalisationen bei Frauen mit Vaginalcandidosen und deren Partnern. Mycoses 1998; 41 (Suppl. 2): 22–25
- 80 Mendling W, Krauss C, Fladung B. A clinical multi-center-study comparing efficacy and tolerability of topical combination therapy with Clotrimazole (Canesten, two formats) with oral single dose fluconazole (Diflucan) in vulvovaginal mycoses. Mycoses 2004; 47: 136–142
- 81 Mendling W, Niemann D, Tintelnot K. Vaginal colonisation with Candida species with special focus on Candida dubliniensis. A prospective study. Geburtsh Frauenheilk 2007; 67: 1132–1137
- 82 Mendling W, Seebacher C. Vulvovaginalkandidose. AWMF-Guideline 013/004 (S1). 2008
- 83 Mendling W. Vaginose, Vaginitis, Zervizitis und Salpingitis. 2. Aufl. Heidelberg; Springer: 2006
- 84 Mendling W, Spitzbart H. Antimykotische Therapie der vaginalen Hefepilz-Kolonisation von Schwangeren zur Verhütung von Kandidamykosen beim Neugeborenen. AMWF, Guideline 015/042 (S1). 2008
- 85 Mendling W, Birkner V. Die Vakzination mit inaktivierten Laktobazillen oder Heliotherapie kann die Lebensqualität von Frauen mit chronisch rezidivierender vulvovaginaler Kandidose verbessern. – Eine prospektive, 3-armige randomisierte Studie. Geburtsh Frauenheilk 2011; 71: 767–772
- 86 Mendling W, Schlegelmilch R. Three-day combination treatment for vulvovaginal Candidosis with 200 mg clotrimazol vaginal suppositories and clotrimazol cream for the vulva is significantly better than treatment with vaginal suppositories alone – an earlier, multi-centre, placebo-controlled double blind study. Geburtsh Frauenheilk 2014; 74: 355–360
- 87 Meyer H, Göttlicher S, Mendling W. Stress as a cause of chronic recurrent vulvovaginal candidosis and the effectiveness of the conventional antimycotic therapy. Mycoses 2006; 48: 202–209
- 88 Molgaard-Nielsen D, Pasternak B, Hviid A. Use of fluconazole during pregnancy and risk of birth defects. N Engl J Med 2013; 369: 830–839
- 89 Moraes PSA, de Lima Goiaba S, Taketoni EA. Candida albicans allergen immunotherapy in recurrent vaginal candidiasis. Invest Allergol Clin Immunol 2000; 10: 305–309

- 90 Müller J, Nold B, Kubitzka D et al. Quantitative Untersuchungen über die Döderlein-Flora gesunder sowie mykosekranker Probandinnen unter lokaler Isoconazol-Nitrat-Therapie. In: Seeliger HPR, Hrsg. Gyno – Travogen, Monographie Excerpta Medica. Amsterdam: Oxford Princeton; 1981: 81–93
- 91 Mylonas I, Bergauer F. Diagnosis of vaginal discharge by wet mount microscopy: a simple and underrated method. *Obstet Gynecol Surv* 2011; 66: 359–368
- 92 Naglik J, Albrecht A, Bader O et al. *Candida albicans* proteinases and host/pathogen interactions. *Cellular Microbiology* 2004; 6: 915–926
- 93 Neves NA, Carvallho LP, de Oliveira MA et al. Association between atopy and recurrent vaginal candidosis. *Clin Exp Immunol* 2005; 142: 167–171
- 94 Niewerth M, Kunze D, Seibold M et al. Clotrimazole treatment affects the expression pattern of metabolism proteins, and drug resistance factors. *Antimicrob Agents Chemother* 2003; 47: 1805–1817
- 95 Nurbhai M, Grimshaw J, Watson M et al. Oral versus intra-vaginal imidazole and triazole anti-fungal treatment of uncomplicated vulvovaginal candidiasis (thrush). *Cochrane Database Syst Rev* 2007; 4: CD002845
- 96 Nyirjesy P, Seeney SM, Grody MH et al. Chronic fungal vaginitis: the value of cultures. *Am J Obstet Gynecol* 1995; 173: 820–823
- 97 Nyirjesy P, Alexander AB, Weitz MV. Vaginal candida parapsilosis: pathogen or bystander? *Infect Dis Obstet Gynecol* 2005; 13: 37–41
- 98 Odds FC. *Candida and Candidosis*. 2nd ed. Baillière Tindall: WB Saunders; 1988
- 99 Odds FC, Arai T, Disalvo AF et al. Nomenclature of fungal diseases: a report and recommendations from a sub-Committee of the International Society for Human and Animal Mycology (ISHAM). *J Med Vet Mycol* 1992; 30: 1–10
- 100 Paulitsch A, Weger W, Ginter-Hanselmayer G et al. A 5-year (2000–2004) epidemiological survey of *Candida* and non-*Candida* yeasts species causing vulvovaginal candidiasis in Graz, Austria. *Mycoses* 2006; 49: 471–475
- 101 Phillips AJ. Treatment of non-*albicans* candida vaginitis with amphotericin B vaginal suppositories. *Am J Obstet Gynecol* 2005; 192: 2009–2012
- 102 Pirotta MV, Gunn JM, Chondros P. “Not thrush again!” Women’s experience of post-antibiotic vulvovaginitis. *Med J Aust* 2003; 179: 43–46
- 103 Pirotta M, Gunn J, Chondros P et al. Effect of lactobacillus in preventing post-antibiotic vulvovaginal candidiasis: a randomised controlled trial. *BMJ* 2004; 329: 548–551
- 104 Pirotta MV, Garland SM. Genital *Candida* species detected in samples from women in Melbourne, Australia, before and after treatment with antibiotics. *J Clin Microbiol* 2006; 44: 3213–3217
- 105 Pitsoni E, Lavazzo C, Falagas ME. Itraconazole vs. fluconazole for the treatment of uncomplicated acute vaginal and vulvovaginal candidiasis in nonpregnant women: a metaanalysis of randomised controlled trials. *Am J Obstet Gynecol* 2008; 198: 153–160
- 106 Plempel M. Pharmakokinetik der Imidazol-Antimykotika. *Mykosen* 1980; 23: 16–27
- 107 Powell BL. Identification of a 173-estradiol-binding protein in *Candida albicans* and *Candida (Torulopsis) glabrata*. *Exp Mycol* 1984; 8: 304
- 108 Queux C, Gelas B, Chevallier T et al. Evaluation of the efficacy and speed of action of sertaconazole nitrate suppository and cream combined treatment for vulvovaginal candidiasis. *Gynecol Obstet Fertil* 2000; 28: 238–244
- 109 Ray D, Goswami R, Bomerjee U et al. Prevalence of *Candida glabrata* and its response to boric acid vaginal suppositories in comparison with oral fluconazole in patients with diabetes and vulvovaginal candidiasis. *Diabetes Care* 2007; 30: 312–317
- 110 Raska M, Belakova J, Horynova M et al. Systemic and mucosal immunization with *Candida albicans* hsp90 elicits hsp90-specific humoral response in vaginal mucosa which is further enhanced during experimental vaginal candidiasis. *Med Mycol* 2008; 46: 411–420
- 111 Reed BD, Zazone P, Pierson LL et al. *Candida* transmission and sexual behaviour as risk for a repeated episode of *Candida* vulvovaginitis. *J Womens Health (Larchmt)* 2003; 12: 979–989
- 112 Richter SS, Galask RP, Messer SA et al. Antifungal susceptibilities of *Candida* species causing vulvovaginitis and epidemiology of recurrent cases. *J Clin Microbiol* 2005; 43: 2155–2162
- 113 Rigg D, Miller MM, Metzger WJ. Recurrent allergic vulvo-vaginitis treatment with *Candida albicans* allergen immunotherapy. *Am J Obstet Gynecol* 1990; 162: 332–336
- 114 Ritter W. Pharmacokinetics of Azole Compounds. In: Berg D, Plempel M, eds. *Sterol Biosynthesis Inhibitors*. Chichester: Ellis Horwood; 1988: 397–429
- 115 Roberts CL, Rickard K, Kotsiou G et al. Treatment of asymptomatic vaginal candidiasis in pregnancy to prevent preterm birth: an open-label pilot randomized controlled trial. *BMC Pregnancy Childbirth* 2011; 11: 18
- 116 Romani L. Immunity to fungal infections. *Nat Rev Immunol* 2011; 11: 275–288
- 117 Romeo O, Criseo G. *Candida africana* and its closest relatives. *Mycoses* 2011; 54: 475–486
- 118 Rosedale N, Browne K. Hyposensitisation in the management of recurring vaginal candidiasis. *Ann Allergy* 1979; 43: 250–253
- 119 Roth AC, Milsom I, Forssman L et al. Intermittent prophylactic treatment of recurrent vaginal candidiasis by postmenstrual application of a 500 mg clotrimazole vaginal tablet. *Genitourin Med* 1990; 66: 357–360
- 120 Rüchel R, Fegeler R, Trost M. Comparison of secretory proteinases from different strains of *Candida albicans*. *Sabouraudia* 1982; 20: 233–244
- 121 Rusch K, Schwiertz A. *Candida* autovaccination in the treatment of vulvovaginal *Candida* infections. *Int J Gynecol Obstet* 2007; 96: 130
- 122 Rylander E, Berglund A-L, Krassny C et al. Vulvovaginal candida in a young sexually active population: prevalence and association with oro-genital sex and frequent pain at intercourse. *Sex Transm Infect* 2004; 80: 54–57
- 123 Savini V, Catavittello C, Manua A et al. Two cases of vaginitis caused by Itraconazole – resistant *Saccharomyces cerevisiae* and review of recently published studies. *Mycopathologia* 2008; 166: 47–50
- 124 Scheklakow ND, Deletorski WW, Goldoa OA. Veränderungen der Ultrastruktur von *Candida albicans* unter Einwirkung von Polyen-Antibiotika. *Mykosen* 1980; 24: 140–152
- 125 Schnell JD. Epidemiology and prevention of peripartur mycoses. *Chemother* 1982; 28 (Suppl. 1): 66–72
- 126 Schnell JD, Voigt WH. Das Verhalten von Sprossspitzen am nicht verhornten Plattenepithel. *Arch Gynaekol* 1974; 217: 377–382
- 127 Shahid Z, Sobel JD. Reduced fluconazole susceptibility of *Candida albicans* isolates in women with recurrent vulvovaginal candidiasis: effects of long-term fluconazole therapy. *Diagn Microbiol Infect Dis* 2009; 64: 354–356
- 128 Sharma C, Muralidhar S, Xu J et al. Multilocus sequence typing of *Candida africana* from patients with vulvovaginal candidiasis in New Delhi, India. *Mycoses* 2014; 57: 544–552
- 129 Singh S, Sobel JD, Bhargava P et al. Vaginitis due to *Candida krusei*: epidemiology, clinical aspects, and therapy. *Clin Inf Dis* 2002; 35: 1066–1070
- 130 Sobel JD. Management of recurrent vulvovaginal candidiasis with intermittent ketoconazole prophylaxis. *Obstet Gynecol* 1985; 65: 435–440
- 131 Sobel JD. Vaginitis due to *Saccharomyces cerevisiae*: epidemiology, clinical aspects, and therapy. *Clin Inf Dis* 1993; 16: 93–99
- 132 Sobel JD. Vulvovaginitis due to *Candida glabrata*. An emerging problem. *Mycoses* 1998; 41 (Suppl. 2): 18–21
- 133 Sobel JD. Vulvovaginal candidosis. *Lancet* 2007; 369: 1961–1971
- 134 Sobel JD, Harold C, Wiesenfeld MD et al. Maintenance fluconazole therapy for recurrent vulvovaginal Candidiasis. *N Engl J Med* 2004; 351: 876–883
- 135 Sobel JD, Myers PG, Kaye D et al. Adherence of *Candida albicans* to human vaginal and buccal epithelial cells. *J Infect Dis* 1981; 143: 76–82
- 136 Sobel JD, Zervos M, Reed BD et al. Fluconazole susceptibility of vaginal isolates obtained from women with complicated *Candida* vaginitis: clinical implications. *Antimicrob Agents Chemother* 2003; 47: 34–38
- 137 Spacek J, Jilek P, Buchtav et al. The serum levels of calcium, magnesium, iron and zinc in patients with recurrent vulvovaginal candidosis during attack, remission and in healthy controls. *Mycoses* 2005; 48: 391–395
- 138 Spinillo A, Capuzzo E, Egbe TO et al. *Torulopsis glabrata* vaginitis. *Obstet Gynecol* 1995; 85: 993–998
- 139 Swidsinski A, Loening-Baucke V, Mendling W et al. Infection through structured polymicrobial Gardnerella biofilms (StPM-GB). *Histol Histopathol* 2014; 29: 567–587
- 140 Tarry W, Fisher M, Shen S et al. *Candida albicans*: the estrogen target for vaginal colonization. *J Surg Res* 2005; 129: 278–282

- 141 Thoden J, Potthoff A, Bogner JR et al. Therapy and prophylaxis of the opportunistic infections in HIV-infected patients: a guideline by the German and Austrian AIDS societies (DAIG/ÖAG) (AWMF 055/066). *Infection* 2013; 41 (Suppl. 2): S91–S115
- 142 Thrumbore DJ, Sobel JD. Recurrent vulvovaginal candidiasis: vaginal epithelial cells susceptibility to *Candida albicans* adherence. *Obstet Gynecol* 1986; 67: 810–812
- 143 Tietz HJ. Gezieltes Vorgehen gegen Problemkeime. *Gyn Geburtsh* 2009; 7–8: 41–44
- 144 Tietz HJ. *Candida glabrata*: Pathogenität und Stand der Dinge. *Hautarzt* 2012; 63: 868–871
- 145 Upmalis DH, Cone FL, Lamia CA et al. Single-dose miconazole nitrate vaginal ovule in the treatment of vulvovaginal candidiasis: two single-blind, controlled studies versus miconazole nitrate 100 mg cream for 7 days. *J Womens Health Gend Based Med* 2000; 9: 421–429
- 146 Vecciarelli A, Pericolini E, Pietrella D. New approaches in the development of a vaccine for mucosal Candidiasis: progress and challenges. *Front Microbiol* 2012; 3: 294
- 147 Vermitsky JP, Self MJ, Chadwick SG et al. Survey of vaginal flora–flora *Candida* species isolates from women of different age groups by use of species-specific PCR detection. *J Clin Microbiol* 2008; 46: 1501–1503
- 148 Wajnberg M, Wajnberg A. Doppelblind-Vergleichsstudie mit Cyclopyroxolamin- und Miconazol-Vaginalcreme bei vulvovaginaler Kandidose. *Mykosen* 1981; 24: 721–730
- 149 Walker PP, Reynolds MT, Ashbee HR et al. Vaginal yeasts in the era of “over the counter” antifungals. *Sex Transm Infect* 2000; 76: 437–238
- 150 Watson MC, Grimshaw JM, Bond CM et al. Oval versus intravaginal imidazole and triazole antifungal treatment of uncomplicated Candidiasis (thrush): a systemic review. *BJOG* 2002; 109: 85–89
- 151 Weissenbacher TM, Witkin SS, Gingelmaier A et al. Relationship between recurrent vulvovaginal candidosis and immune mediators in vaginal fluid. *Eur J Obstet Gynecol Reprod Biol* 2009; 144: 59–63
- 152 Weissenbacher T, Witkin SS, Ledger WJ et al. Relationship between clinical diagnosis of recurrent vulvovaginal candidiasis and detection of *Candida* species by culture and polymerase chain reaction. *Arch Gynecol Obstet* 2009; 279: 125–129
- 153 van de Wijgert JH, Verwijs MC, Turner AN et al. Hormonal contraception decreases bacterial vaginosis but oral contraception may increase candidiasis: implications for HIV transmission. *AIDS* 2013; 27: 2141–2153
- 154 Wilson C. Recurrent vulvovaginal candidiasis; an overview of traditional and alternative therapies. *Adv Nurse Pract* 2005; 13: 24–29
- 155 Witkin SS, Jeremias J, Ledger WJ. A localized vaginal allergic response in women with recurrent vaginitis. *J Allergy Clin Immunol* 1988; 81: 412–416
- 156 Witkin SS, Giraldo P, Linhares D. New insights into the immune pathogenesis of recurrent vulvovaginal candidiasis. *Int J Gynecol Obstet* 2000; 3: 114–118
- 157 Witt A, Kaufmann U, Bitschnau M et al. Monthly itraconazole versus classic homeopathy for the treatment of recurrent vulvovaginal candidiasis: a randomised trial. *BJOG* 2009; 11: 1499–1505
- 158 Wozniak KL, Palmer G, Kutner R et al. Immunotherapeutic approaches to enhance protective immunity against *Candida* vaginitis. *Med Mycol* 2005; 43: 589–601
- 159 Xu J, Schwartz K, Bartoces M et al. Effect of antibiotics on vulvovaginal candidiasis: a MetroNet study. *J Am Board Fam Med* 2008; 21: 261–208
- 160 Young GL, Jewell D. Topical treatment for vaginal candidiasis (thrush) in pregnancy. *Cochrane Database Syst Rev* 2001; 4: CD000225
- 161 von Zglinicki W. Die Hormonspirale als Ursache für chronische Infektionen. Dissertation (Prof. HJ Tietz). Charité; 2011

## Anhang Leitlinienreport

### 1 Konsensverfahren

Die Leitlinie wurde unter repräsentativer Beteiligung der Adressaten erstellt. Da es sich um eine Aktualisierung mit überschaubaren Änderungen handelte, wurde auf eine Konsensuskonferenz verzichtet. Die Änderungen wurden im schriftlichen DELPHI-Verfahren eingeholt und durch den Koordinator zusammengefasst und eingepflegt. In insgesamt 3 Runden wurde die aktuelle Endversion einvernehmlich verabschiedet.

### 2 Patientenbeteiligung

Patientenvertreter waren mangels einschlägiger Patientenorganisationen nicht beteiligt.

### 3 Bewertung und Umgang mit potenziellen Interessenkonflikten

Alle Beteiligten füllten das AWMF-Formular aus. Die Mehrheit der Beteiligten hat finanziell honorierte Beziehungen zu Industrieunternehmen. Eine spezifische Bewertung von Interessenkonflikten fand nicht statt. Als protektiv für eine verzerrte Darstellung von Ergebnissen durch die Leitliniengruppe wird die formal konsensbasierte Erarbeitung gesehen.

### 4 Beteiligung von Fachgesellschaften/ Verabschiedung

Diese Leitlinie wurde von folgenden Fachgesellschaften und Teilnehmern konsentiert:

- ▶ Deutsche Gesellschaft für Gynäkologie und Geburtshilfe (DGGG)

- ▶ AG für Infektionen und Infektionsimmunologie in Gynäkologie und Geburtshilfe (AGII)
- ▶ Deutsche Dermatologische Gesellschaft (DDG)
- ▶ Deutschsprachige Mykologische Gesellschaft (DMyKG)

### 5 Gültigkeit/Aktualisierung

Die Gültigkeit der Leitlinie wurde durch den Vorstand der DGGG und die DGGG-Leitlinienkommission im Dezember 2013 bestätigt.

Die Gültigkeitsdauer der Leitlinie geht bis 12/2016.

Sollten sich zwischenzeitlich potenziell relevante Änderungen ergeben, werden diese der Leitliniengruppe durch den Koordinator mitgeteilt und entschieden, ob eine Änderung/ein Addendum erforderlich ist. Kommentare zu Leitlinie sind erwünscht.

Ansprechpartner ist der Leitlinienkoordinator, Prof. W. Mendling.

Die „Leitlinien“ der Wissenschaftlichen Medizinischen Fachgesellschaften sind systematisch entwickelte Hilfen für Ärzte zur Entscheidungsfindung in spezifischen Situationen. Sie beruhen auf aktuellen wissenschaftlichen Erkenntnissen und in der Praxis bewährten Verfahren und sorgen für mehr Sicherheit in der Medizin, sollen aber auch ökonomische Aspekte berücksichtigen. Die „Leitlinien“ sind für Ärzte rechtlich nicht bindend und haben daher weder haftungsbegründende noch haftungsbefreiende Wirkung. Die AWMF erfasst und publiziert die Leitlinien der Fachgesellschaften mit größtmöglicher Sorgfalt – dennoch kann die AWMF für die Richtigkeit des Inhalts keine Verantwortung übernehmen. Insbesondere bei Dosierungsangaben sind stets die Angaben der Hersteller zu beachten!

|                                                  |                                                                                                                                                                                                                                                                                                                                                                                |
|--------------------------------------------------|--------------------------------------------------------------------------------------------------------------------------------------------------------------------------------------------------------------------------------------------------------------------------------------------------------------------------------------------------------------------------------|
| Website                                          | <a href="http://www.awmf.org/leitlinien/detail/II/015-072.html">http://www.awmf.org/leitlinien/detail/II/015-072.html</a>                                                                                                                                                                                                                                                      |
| Erstellungsdatum                                 | 31.12.2013                                                                                                                                                                                                                                                                                                                                                                     |
| Nächste Überprüfung geplant                      | 31.12.2016                                                                                                                                                                                                                                                                                                                                                                     |
| Interessenkonflikterklärung                      | Auf der Webseite der AWMF unter: <a href="http://www.awmf.org/leitlinien/detail/II/015-072.html">http://www.awmf.org/leitlinien/detail/II/015-072.html</a>                                                                                                                                                                                                                     |
| Beteiligte Fachgesellschaften und Organisationen | <ul style="list-style-type: none"> <li>▶ Deutsche Gesellschaft für Gynäkologie und Geburtshilfe (DGGG) e.V. (federführend)</li> <li>▶ Arbeitsgemeinschaft für Infektionen und Infektionsimmunologie in der Gynäkologie und Geburtshilfe (AGII)</li> <li>▶ Deutsche Dermatologische Gesellschaft (DDG)</li> <li>▶ Deutschsprachige Mykologische Gesellschaft (DMyKG)</li> </ul> |
